# Supplementary material for: Alterations in Tissue Metabolite Profiles with Amifostine-Prophylaxed Mice Exposed to Gamma Radiation
Source: PubMed Central journal article supplement (PMC7281564; doi:10.3390/metabo10050211), 2020-05-21
Supplement: metabolites-10-00211-s001.pdf [file metabolites-10-00211-s001.pdf]

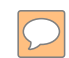

# Supplementary Figure 1

A

| Name             | POS      | Initial INPUT | PPM error |
|------------------|----------|---------------|-----------|
| Acetaminophen    | 152.0712 | 152.0713      | 0.65      |
| Sulfaguanidine   | 215.0603 | 215.0607      | 1.85      |
| Sulfadimethoxine | 311.0814 | 311.0815      | 0.32      |
| Val-Tyr-Val      | 380.2185 | 380.2183      | -0.52     |
| Terfenadine      | 472.3216 | 472.3212      | -0.84     |
| Leu-Enkephalin   | 556.2771 | 556.2778      | 1.25      |

| Name             | POS      | Final INPUT | PPM error |
|------------------|----------|-------------|-----------|
| Acetaminophen    | 152.0712 | 152.0713    | 0.65      |
| Sulfaguanidine   | 215.0603 | 215.0608    | 2.32      |
| Sulfadimethoxine | 311.0814 | 311.0809    | -1.6      |
| Val-Tyr-Val      | 380.2185 | 380.2185    | 0         |
| Terfenadine      | 472.3216 | 472.321     | -1.27     |
| Leu-Enkephalin   | 556.2771 | 556.2766    | -0.89     |

B

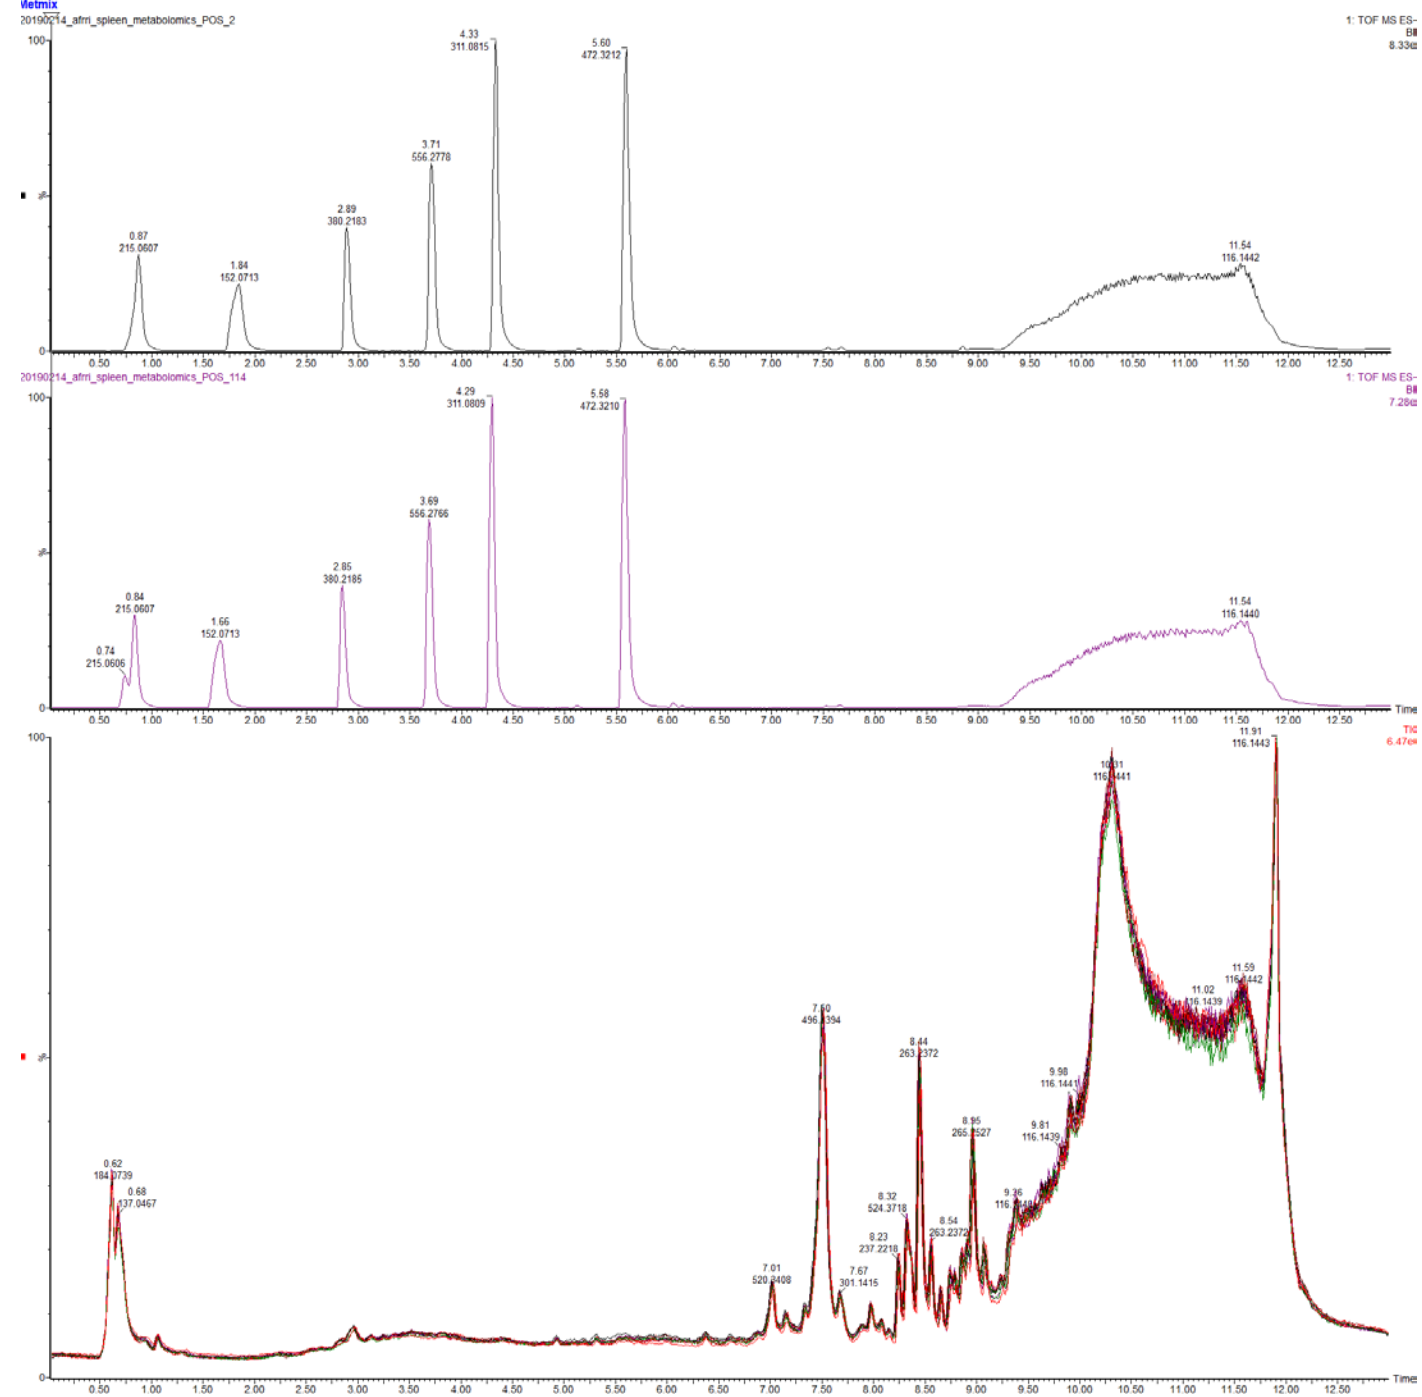

1: TOF MS ES-  
B8  
8.33e

1: TOF MS ES-  
B8  
7.28e

TIC  
6.47e

**Supplementary Figure 1:** **A)** Mass accuracy checks were performed at the beginning and end of the batch using a mix of 6 standard compounds. The ppm mass accuracy checks for these 6 compounds were all within 5 ppm for both positive and negative ionization modes. **B)** Chromatograms of the mass accuracy checks at the beginning (top) and the end (bottom) of a batch. **C)** Overlay of all pooled QC samples throughout a batch show minimum shifts in retention times and intensities.



**Supplementary Figure 2: Circos plot for identified metabolites and their correlations**

**before (Panel A) and after (Panel B) radiation expose at SD4 in spleen tissue.** This figure

illustrates the dysregulating impact of ionizing radiation on the metabolic profiles. Each band in

the plot represents a statistical measure of the strength of a monotonic relationship between

paired metabolites. Spearman correlation coefficient was set to a minimum of 0.5 and the p value

< 0.01.

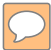

# Vehicle

# Radiation

## Supplementary Figure 3

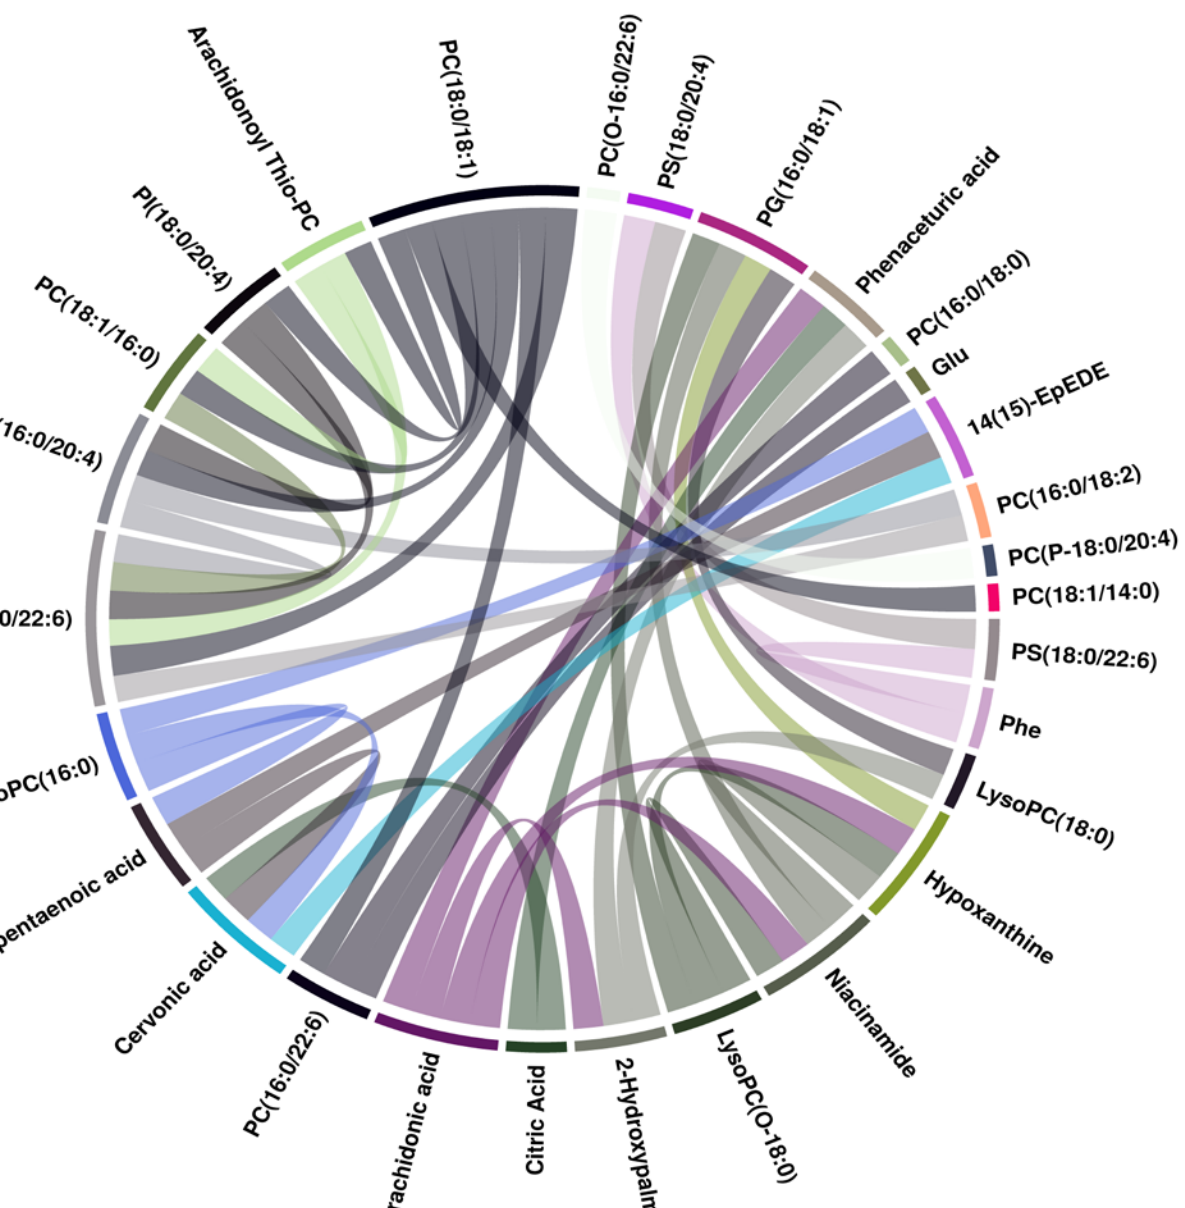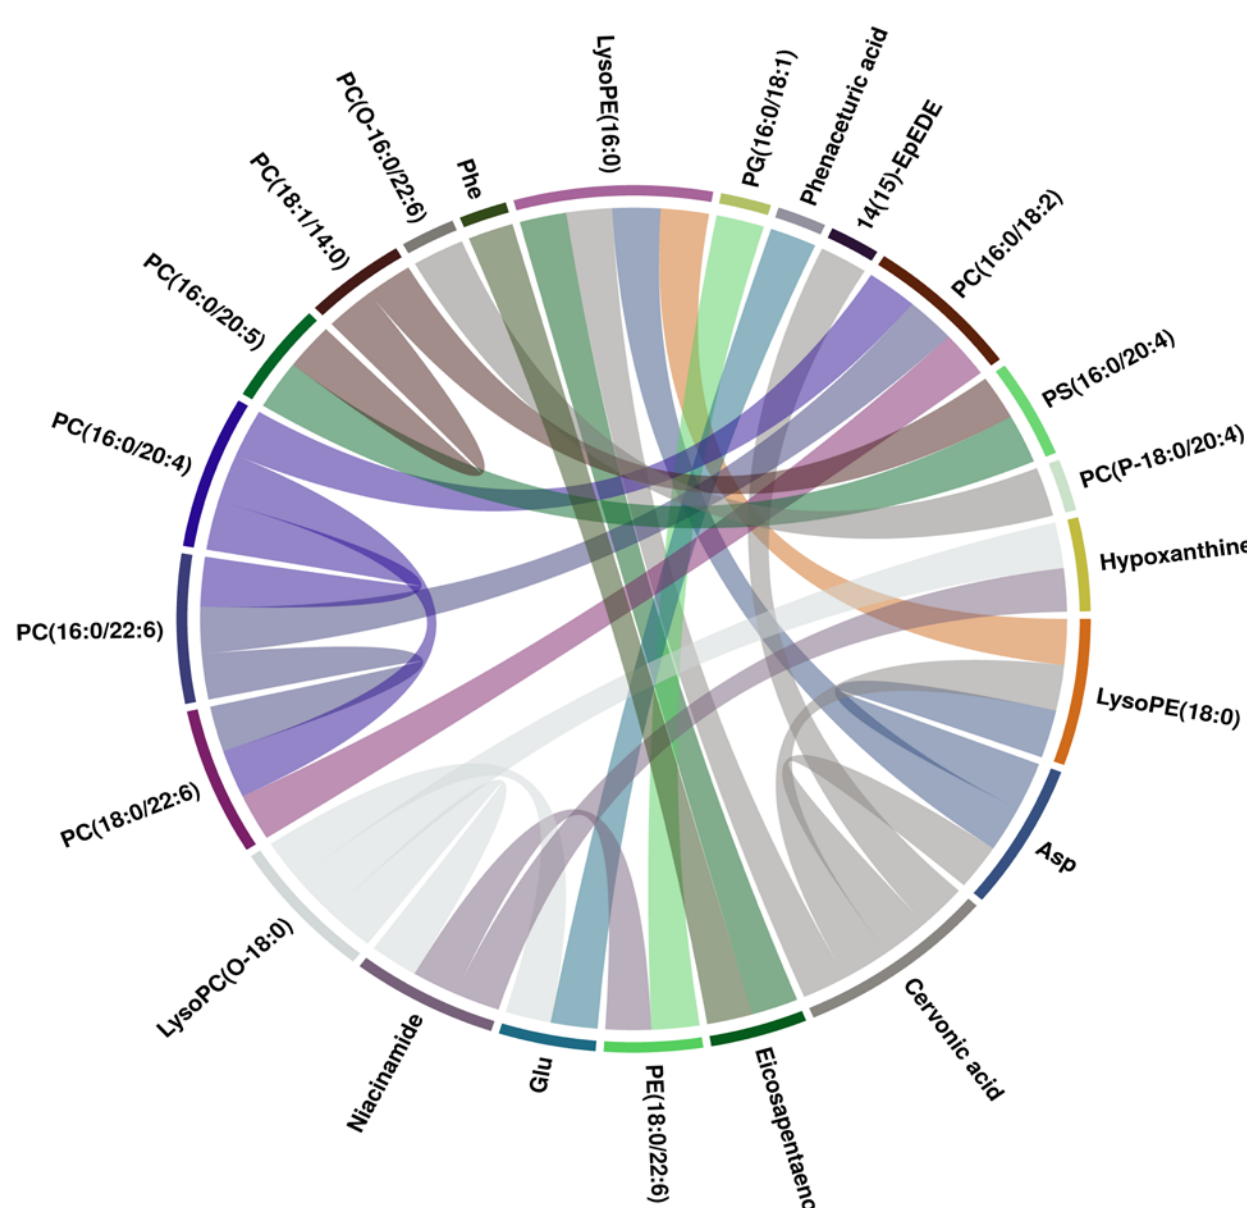

**Supplementary Figure 3: Circos plot for identified metabolites and their correlations**

**before (Panel A) and after (Panel B) radiation expose at SD4 for kidney tissue.** This figure

illustrates the dysregulating impact of ionizing radiation on the metabolic profiles. Each band in

the plot represents a statistical measure of the strength of a monotonic relationship between

paired metabolites. Spearman correlation coefficient was set to a minimum of 0.5 and the p value

< 0.01.



Supplementary Table 1. Table of Tandem MS Validated Metabolites

| Name                                                                                                          | Ionization Mode | Matrix | precursor m/z | rt    | Synonyms                                                       | Adduct                    | Level | CID                                                                                                                                            | Class                                    |
|---------------------------------------------------------------------------------------------------------------|-----------------|--------|---------------|-------|----------------------------------------------------------------|---------------------------|-------|------------------------------------------------------------------------------------------------------------------------------------------------|------------------------------------------|
| N-(1-Oxo-5,8,12,14-ecosatetraenyl)-L-serine                                                                   | Positive        | Heart  | 375.2612      | 7.63  | N-Arachidonyl-L-alanine                                        | [M+H] <sup>+</sup>        | 1     | 375.26, 267.26, 269.22, 245.22, 213.16, 203.17, 185.13, 171.11, 147.11, 131.1, 119.08, 105.06, 95.08, 81.06                                    | N-Acyl Amino Acids                       |
| 1-Glycerolate                                                                                                 | Positive        | Heart  | 357.2772      | 8.9   | Monocole                                                       | [M+H] <sup>+</sup>        | 1     | 557.29, 339.29, 265.25, 177.16, 149.13, 135.11, 121.11, 109.1, 95.08, 81.07, 69.07                                                             | Monoglycerides                           |
| DL-2-Aminolevulinic acid                                                                                      | Positive        | Heart  | 118.0874      | 0.43  | DL-Norvaline                                                   | [M+H] <sup>+</sup>        | 1     | 118.08, 72.08                                                                                                                                  | Amino Acids                              |
| L-Glutamine                                                                                                   | Positive        | Heart  | 147.0776      | 0.44  | Gln                                                            | [M+H] <sup>+</sup>        | 1     | 147.06, 130.06, 84.04                                                                                                                          | Amino Acids                              |
| cs-5,8,11,14-Eicosatetraenoic acid                                                                            | Positive        | Heart  | 305.2484      | 8.01  | Arachidonic acid                                               | [M+H] <sup>+</sup>        | 1     | 305.24, 287.23, 269.22, 245.22, 221.15, 177.16, 147.11, 121.1, 95.08                                                                           | Fatty Acids And Derivatives              |
| (3R)-3-Hydroxy-4-(trimethylammonio)butanoate (alpha-Methylguanido)acetate acid                                | Positive        | Heart  | 162.1136      | 0.41  | L-Carnitine                                                    | [M+H] <sup>+</sup>        | 1     | 162.11, 103.03, 85.08, 60.08                                                                                                                   | Amino Acids                              |
| L-Glutamic acid                                                                                               | Positive        | Heart  | 132.0778      | 0.42  | Creatine                                                       | [M+H] <sup>+</sup>        | 1     | 132.07, 114.06, 90.05                                                                                                                          | Amino Acids                              |
| 1-Stearyl-2-hydroxy-sn-glycero-3-phosphocholine                                                               | Positive        | Heart  | 348.0049      | 0.43  | Glü                                                            | [M+H] <sup>+</sup>        | 1     | 148.00, 130.05, 102.05, 84.04                                                                                                                  | Amino Acids                              |
| Docosahexaenoic acid methyl ester                                                                             | Positive        | Heart  | 324.2711      | 7.46  | LysoPC(18:0)                                                   | [M+H] <sup>+</sup>        | 1     | 324.27, 306.36, 341.3, 184.07, 104.1                                                                                                           | Phosphatidylcholines                     |
| Adenosine 5'-monophosphate                                                                                    | Positive        | Heart  | 342.2033      | 9.11  | Methyl DPA                                                     | [M+2H] <sup>+</sup>       | 1     | 345.2787, 344.2668, 343.2641, 311.2384, 301.2101, 161.1136, 145.1016, 131.1013, 131.0855, 121.1017, 119.0854, 107.0856, 105.07, 95.0859, 93.07 | Fatty Acids And Derivatives              |
| 1-Palmitoyl-sn-glycero-3-phosphocholine                                                                       | Positive        | Heart  | 348.0715      | 0.45  | N-Adrenic acid                                                 | [M+H] <sup>+</sup>        | 2     | 348.07, 137.04, 136.0619, 03, 97.02                                                                                                            | Nucleoside Monophosphate                 |
| 1-Stearyl-2-hydroxy-sn-glycero-3-phosphoethanolamine                                                          | Positive        | Heart  | 391.0713      | 6.71  | LysoPC(18:0)                                                   | [M+H] <sup>+</sup>        | 1     | 391.07, 373.07, 406.36, 341.3, 184.07, 104.08                                                                                                  | Phosphatidylcholines                     |
| N-Eicosanoylshingosine                                                                                        | Positive        | Heart  | 482.2348      | 7.43  | LysoPE(18:0)                                                   | [M+H] <sup>+</sup>        | 2     | 482.32, 464.31, 421.27, 341.3, 310.31                                                                                                          | Lysocephosphatidylethanolamine           |
| N-(1R)-2-Hydroxy-1-methylvelthyl-9Z-octadecanamide                                                            | Positive        | Heart  | 575.5029      | 10.8  | Cer(d18:1/20:0)                                                | [M+H-2H2O] <sup>+</sup>   | 2     | 575.5, 282.22, 264.27, 262.25, 252.26                                                                                                          | Ceramides                                |
| cs-4,7,10,13,16-Docosatetraenoic acid                                                                         | Positive        | Heart  | 323.2528      | 8.15  | Methyl oleoylethanolamide                                      | [M+H-2H2O] <sup>+</sup>   | 2     | 323.25, 263.23, 245.22, 191.17, 177.17, 163.2, 149.132, 135.17, 121.05, 109.1, 97.1                                                            | N-Acyl Amino Acids                       |
| Docosapentaenoic acid methyl ester                                                                            | Positive        | Heart  | 329.2477      | 7.48  | Cer(d18:1/20:0)                                                | [M+H] <sup>+</sup>        | 2     | 329.24, 293.22, 269.22, 247.16, 215.17, 201.16, 175.14, 159.11, 145.1, 131.1, 119.08, 107.08, 96.08, 81.06                                     | Fatty Acids And Derivatives              |
| 82.142-Eicosadienoic acid                                                                                     | Positive        | Heart  | 344.2587      | 8.67  | Methyl DPA                                                     | [M+2H] <sup>+</sup>       | 2     | 344.25, 311.23, 293.22, 287.23, 283.21, 279.19, 269.22, 255.17, 261.18, 241.16, 215.16, 201.16, 161.13, 133.1, 93.07, 67.05                    | Fatty Acids And Derivatives              |
| Ricinoleic acid methyl ester                                                                                  | Positive        | Heart  | 291.2665      | 8.27  | Eicosadienoic acid                                             | [M+H-2H2O] <sup>+</sup>   | 2     | 291.26, 147.11, 123.11, 109.1, 95.08, 81.07, 67.05                                                                                             | Fatty Acids And Derivatives              |
| cs-8,11,14-Eicosatrienoic acid                                                                                | Positive        | Heart  | 307.2588      | 8.32  | γ-Hemolipidic acid                                             | [M+H] <sup>+</sup>        | 1     | 313.27, 295.26, 263.22, 245.22                                                                                                                 | Fatty Acids And Derivatives              |
| 2-Arachidonylcholine                                                                                          | Positive        | Heart  | 379.2825      | 8.14  | 2-AG                                                           | [M+H] <sup>+</sup>        | 2     | 379.28, 305.24, 287.23, 269.22, 245.22, 203.17                                                                                                 | Monoglycerides                           |
| 1-Palmitoyl-2-hydroxy-sn-glycero-3-phosphoethanolamine                                                        | Positive        | Heart  | 454.3896      | 6.9   | LysoPE(16:0)                                                   | [M+H] <sup>+</sup>        | 2     | 454.38, 313.27, 155.02, 85.02                                                                                                                  | Lysocephosphatidylethanolamine           |
| cs-7,10,13,16-Docosatetraenoic acid                                                                           | Positive        | Heart  | 331.2793      | 8.55  | Adrenic Acid (22:4, n-6)                                       | [M+H] <sup>+</sup>        | 2     | 331.27, 249.18, 205.19, 135.11, 121.1                                                                                                          | Fatty Acids And Derivatives              |
| 13-Docosanamide, [Z]                                                                                          | Positive        | Heart  | 338.1829      | 8.61  | Euramide                                                       | [M+H] <sup>+</sup>        | 2     | 338.18, 303.3, 163.14, 135.1, 121.1, 109.1, 95.08, 81.07                                                                                       | Fatty Acids And Derivatives              |
| 5-Heptenoic acid, 7-(1R,4S,5S,6R)-6-(1E,3S,5Z)-3-hydroxy-1,5-oxetan-1-yl)-2-oxabicyclo[2.2.1]hept-5-yl-, (5Z) | Positive        | Heart  | 331.2637      | 8.11  | DELTA17-U-46619                                                | [M+H-2H2O] <sup>+</sup>   | 2     | 331.26, 239.14, 135.11, 121.1, 109.1, 95.08, 81.07                                                                                             | Prostaglandins And Derivatives           |
| 1-Hexadecanoyl-2-oxo-3-acylglycerol-sn-glycero-3-phosphocholine                                               | Positive        | Heart  | 758.5099      | 8.97  | PC(16:0/18:2)                                                  | [M+H] <sup>+</sup>        | 2     | 758.56, 184.07, 86.09                                                                                                                          | Phosphatidylcholines                     |
| 2-Dipalmitoyl-sn-glycero-3-phosphocholine                                                                     | Positive        | Heart  | 730.5382      | 9.74  | PC(16:1/16:1)                                                  | [M+H] <sup>+</sup>        | 2     | 730.53, 184.07, 86.09                                                                                                                          | Phosphatidylcholines                     |
| 1-Palmitoyl-2-oleoyl-phosphatidylcholine                                                                      | Positive        | Heart  | 771.5146      | 11.04 | PG(16:0/18:1)                                                  | [M+Na] <sup>+</sup>       | 2     | 771.52, 577.2, 195.08, 67.05                                                                                                                   | Phosphatidylcholine                      |
| 2-Dipalmitoyl-sn-glycero-3-phospho-1'-rac-glycerol                                                            | Positive        | Heart  | 793.5039      | 11.99 | PG(18:2)                                                       | [M+Na] <sup>+</sup>       | 2     | 793.5, 195.08                                                                                                                                  | Diglycerides                             |
| 2-Dioleoyl-sn-glycero-3-phosphocholine                                                                        | Positive        | Heart  | 797.5111      | 11.99 | PC(18:1/18:1)                                                  | [M+Na] <sup>+</sup>       | 2     | 797.51, 195.08                                                                                                                                 | Diglycerides                             |
| N-(1-Oxo-5,8,12,14-ecosatetraenyl)-L-serine                                                                   | Positive        | Heart  | 287.2357      | 8.02  | N-Arachidonyl-L-serine                                         | [M+H-CH3TOH] <sup>+</sup> | 2     | 287.23, 269.22, 203.17, 171.11, 148.97, 131.04, 119.08                                                                                         | N-Acyl Amino Acids                       |
| 1-Octadecanoyl-2-oxo-3-acylglycerol-sn-glycero-3-phosphocholine                                               | Positive        | Heart  | 810.5073      | 9.69  | PC(18:0/18:1)                                                  | [M+Na] <sup>+</sup>       | 2     | 810.5, 184.07                                                                                                                                  | Phosphatidylcholines                     |
| Arachidonylthiophosphocholine                                                                                 | Positive        | Heart  | 784.5823      | 9.86  | Arachidonyl-Thio-PC                                            | [M+H] <sup>+</sup>        | 2     | 784.58, 184.07                                                                                                                                 | Thiophospholipids                        |
| 2-Docosahexaenoyl-1-stearyl-sn-glycero-3-phosphoethanolamine                                                  | Positive        | Heart  | 792.5703      | 9.89  | PC(18:0/22:6)                                                  | [M+H] <sup>+</sup>        | 2     | 792.57, 659.53                                                                                                                                 | Phosphatidylethanolamine                 |
| 6H-Purin-6-one, 1,7-dihydro                                                                                   | Positive        | Heart  | 137.047       | 0.47  | Hypoxanthine                                                   | [M+H] <sup>+</sup>        | 2     | 137.04, 119.03, 103.03, 82.03                                                                                                                  | Purine Derivatives                       |
| 7α,12α-Dihydroxyccholest-4-en-3-one                                                                           | Positive        | Heart  | 400.2676      | 7.69  | 7α,12α-Dihydroxyccholest-4-en-3-one                            | [M+H-2H2O] <sup>+</sup>   | 3     | 400.28, 269.22, 227.17, 185.12, 159.11, 131.07, 93.06                                                                                          | 7α/12α-Hydroxy Steroid                   |
| 9(10)-Epoxy-12-oxo-3-acylglycerol-sn-glycero-3-phosphocholine                                                 | Positive        | Heart  | 279.2323      | 8.69  | Methyl-Epoxy-12-oxo-3-acylglycerol-sn-glycero-3-phosphocholine | [M+H-2H2O] <sup>+</sup>   | 3     | 279.23, 173.13, 149.13, 135.16, 123.18, 104.1                                                                                                  | Phosphatidylcholines                     |
| 15(R),19(R)-Hydroxystauroldin E1                                                                              | Positive        | Heart  | 353.2668      | 8.12  | 15-19-Hydroxy PGE1                                             | [M+H-2H2O] <sup>+</sup>   | 3     | 353.26, 263.23, 245.22, 121.1, 95.08, 81.08                                                                                                    | Prostaglandins And Derivatives           |
| 1-Palmitoyl-2-stearyl-sn-glycero-3-phosphocholine                                                             | Positive        | Heart  | 762.5126      | 9.67  | PC(16:0/18:0)                                                  | [M+H] <sup>+</sup>        | 3     | 762.51, 184.07                                                                                                                                 | Phosphatidylcholines                     |
| 9Z-12-Octadecadienoic acid, 2-ylcervil ester                                                                  | Positive        | Heart  | 355.2837      | 7.63  | 2-Linoleoylhexcerol                                            | [M+H] <sup>+</sup>        | 1     | 355.28, 337.27, 263.23, 245.22, 189.16, 175.14, 149.13, 135.11, 121.1, 95.08, 81.06                                                            | Monoglycerides                           |
| 1-Propanaminium, 2-(benzylthio)-2-carboxy-N,N,N-trimethyl-, inner salt                                        | Positive        | Heart  | 204.1241      | 0.44  | Trimethylamine                                                 | [M+H] <sup>+</sup>        | 1     | 204.13, 145.04, 85.02                                                                                                                          | Monoglycerides                           |
| Palmitoyllecithinogenantonyl phosphatidylcholine                                                              | Positive        | Heart  | 780.5537      | 9.7   | PC(16:0/20:5)                                                  | [M+H] <sup>+</sup>        | 2     | 780.55, 184.07                                                                                                                                 | Phosphatidylcholine                      |
| 2-Oleoyl-1-palmitoyl-sn-glycero-3-phosphocholine                                                              | Positive        | Heart  | 760.5854      | 9.96  | PC(16:0/18:1)                                                  | [M+H] <sup>+</sup>        | 2     | 760.58, 184.07                                                                                                                                 | Phosphatidylcholine                      |
| 1-Docosahexaenoyl-2-stearyl-sn-glycero-3-phosphocholine                                                       | Positive        | Heart  | 834.0079      | 9.89  | PC(22:6/18:0)                                                  | [M+H] <sup>+</sup>        | 2     | 834.06, 184.07                                                                                                                                 | Phosphatidylcholines                     |
| 1-Palmitoyl-2-docosahexaenoyl-sn-glycero-3-phosphocholine                                                     | Positive        | Heart  | 806.5694      | 9.78  | PC(16:0/22:6)                                                  | [M+H] <sup>+</sup>        | 2     | 806.56, 184.07                                                                                                                                 | Phosphatidylcholines                     |
| 1-Stearyl-2-hydroxy-sn-glycero-3-phosphoethanolamine                                                          | Negative        | Kidney | 480.309       | 8.31  | LysoPE(18:0)                                                   | [M-H] <sup>-</sup>        | 2     | 480.3, 283.26, 196.03, 140.01, 78.95                                                                                                           | Phosphatidylethanolamine And Derivatives |
| L-Glutamic acid                                                                                               | Negative        | Kidney | 146.045       | 0.62  | Glü                                                            | [M-H] <sup>-</sup>        | 1     | 146.04, 128.04, 102.05, 85.02                                                                                                                  | Amino Acids And Derivates                |
| 2-Hydroypalmitic acid                                                                                         | Negative        | Kidney | 271.2269      | 8.59  | 2-Hydroypalmitic acid                                          | [M-H] <sup>-</sup>        | 1     | 271.22, 279.25, 225.21                                                                                                                         | Fatty Acids And Derivatives              |
| 1,1,3-Propanetricarboxylic acid, 2-hydroxy-                                                                   | Negative        | Kidney | 191.0187      | 0.7   | Citric Acid                                                    | [M-H] <sup>-</sup>        | 1     | 191.01, 129.01, 111.09, 87.01, 85.02                                                                                                           | Miscellaneous                            |
| 1-Palmitoyl-2-arachidonyl-sn-glycero-3-phosphocholine                                                         | Negative        | Kidney | 826.5698      | 10.2  | PC(16:0/20:4)                                                  | [M+H-2CO2] <sup>-</sup>   | 1     | 826.570, 766.5362, 480.3084, 303.2321, 255.2321                                                                                                | Phosphatidylcholine And Derivatives      |
| 1-Palmitoyl-2-linoleoyl-sn-glycero-3-phosphocholine                                                           | Negative        | Kidney | 802.5607      | 10.25 | PC(16:0/18:2)                                                  | [M+H] <sup>-</sup>        | 1     | 802.56, 740.53, 480.3, 391.22, 279.23, 255.23                                                                                                  | Phosphatidylcholine And Derivatives      |
| Carboxylic thromboxane A2                                                                                     | Negative        | Kidney | 329.2477      | 9.63  | Carboxylic thromboxane A2                                      | [M+H-2H2O] <sup>-</sup>   | 1     | 329.24, 270.28, 258.03, 231.2046                                                                                                               | Miscellaneous                            |
| cs-4,7,10,13,16,19-Docosahexaenoic acid                                                                       | Negative        | Kidney | 327.2322      | 8.65  | Cervonic acid                                                  | [M+H] <sup>-</sup>        | 1     | 327.23, 309.2, 283.24, 249.18, 229.19, 191.18, 177.16                                                                                          | Fatty Acids And Derivatives              |
| 1-Palmitoyl-2-docosahexaenoyl-sn-glycero-3-phosphocholine                                                     | Negative        | Kidney | 850.5611      | 10.15 | PC(16:0/22:6)                                                  | [M-H] <sup>-</sup>        | 2     | 850.56, 790.54, 480.3, 373.23, 283.24                                                                                                          | Phosphatidylcholine And Derivatives      |
| 1-Stearyl-2-arachidonyl-sn-glycero-3-phospho-1'-myo-inositol                                                  | Negative        | Kidney | 886.6084      | 10.37 | PC(18:0/24:1)                                                  | [M+2H] <sup>-</sup>       | 2     | 886.6, 415.25, 283.26                                                                                                                          | Phosphatidylcholine And Derivatives      |
| 1-Oleoyl-2-palmitoyl-sn-glycero-3-phosphocholine                                                              | Negative        | Kidney | 804.5756      | 10.35 | PC(18:1/16:0)                                                  | [M+H] <sup>-</sup>        | 2     | 804.57, 744.55, 281.24, 255.23                                                                                                                 | Phosphatidylcholine And Derivatives      |
| 1-Palmitoyl-2-hydroxy-sn-glycero-3-phosphoethanolamine                                                        | Negative        | Kidney | 452.2776      | 7.48  | LysoPE(16:0)                                                   | [M-H] <sup>-</sup>        | 2     | 452.27, 255.23, 196.04                                                                                                                         | Phosphatidylethanolamine And Derivatives |
| 8,11-Hidecaenoic acid, 13-(3S)-penmy-2-oxiranyl-, (8Z,11Z)                                                    | Negative        | Kidney | 303.2323      | 8.79  | 14(1S)-E-10DE                                                  | [M+H-2H2O] <sup>-</sup>   | 1     | 303.23, 285.22, 220.22, 259.24, 221.21, 191.1077, 177.0919, 163.0764                                                                           | Fatty Acids And Derivatives              |
| 1-Stearyl-2-docosahexaenoyl-sn-glycero-3-phosphocholine                                                       | Negative        | Kidney | 818.5859      | 10.26 | PC(18:0/22:6)                                                  | [M+H-2CO2] <sup>-</sup>   | 1     | 818.58, 797.56, 480.3, 391.22, 279.23, 283.26                                                                                                  | Phosphatidylcholine And Derivatives      |
| 1-Palmitoyl-2-arachidonyl-sn-glycero-3-phosphoserine                                                          | Negative        | Kidney | 781.4888      | 11.91 | PS(16:0/20:4)                                                  | [M+2H] <sup>-</sup>       | 2     | 781.48, 605.48, 439.22, 391.22, 303.23, 255.23                                                                                                 | Phosphatidylserine And Derivatives       |
| 1-Stearyl-2-hydroxy-sn-glycero-3-phosphocholine                                                               | Negative        | Kidney | 568.2675      | 7.42  | LysoPC(18:0)                                                   | [M+Formic-H] <sup>-</sup> | 2     | 568.26, 508.33, 419.25, 283.26, 224.06, 152.99                                                                                                 | Phosphatidylcholine And Derivatives      |
| 2-Docosahexaenoyl-1-stearyl-sn-glycero-3-phosphoserine                                                        | Negative        | Kidney | 834.0328      | 11.91 | PS(22:6/18:0)                                                  | [M+H] <sup>-</sup>        | 2     | 834.03, 747.49, 403.22, 419.25, 283.26, 152.99                                                                                                 | Phosphatidylserine And Derivatives       |
| Glycine, N-(2-phenylacetyl)-                                                                                  | Negative        | Kidney | 192.0654      | 3.15  | Phenacetic acid                                                | [M-H] <sup>-</sup>        | 1     | 192.06, 74.02                                                                                                                                  | Amino Acids And Derivatives              |
| 1-Palmitoyl-2-oleoyl-phosphatidylcholine                                                                      | Negative        | Kidney | 747.5197      | 10.26 | PG(16:0/18:1)                                                  | [M-H] <sup>-</sup>        | 2     | 747.51, 281.24, 152.99                                                                                                                         | Phosphatidylcholine And Derivatives      |
| 1-Palmitoyl-2-stearyl-sn-glycero-3-phosphocholine                                                             | Negative        | Kidney | 806.5851      | 10.39 | PC(16:0/18:0)                                                  | [M+H-2CO2] <sup>-</sup>   | 1     | 806.58, 746.5676, 480.3088, 283.2633, 255.2320                                                                                                 | Phosphatidylcholine And Derivatives      |
| L-Aspartic acid                                                                                               | Negative        | Kidney | 132.0293      | 0.6   | Asp                                                            | [M+H] <sup>-</sup>        | 1     | 132.02, 115.84, 94.04, 71.01                                                                                                                   | Fatty Acids And Derivatives              |
| 2-Docosahexaenoyl-1-stearyl-sn-glycero-3-phosphoethanolamine                                                  | Negative        | Kidney | 790.5385      | 10.3  | PE(18:0/22:6)                                                  | [M-H] <sup>-</sup>        | 2     | 790.53, 480.3, 327.23, 283.26                                                                                                                  | Phosphatidylethanolamine And Derivatives |
| 1-Stearyl-2-arachidonyl-sn-glycero-3-phosphoserine                                                            | Negative        | Kidney | 810.5296      | 11.92 | PS(18:0/20:4)                                                  | [M-H] <sup>-</sup>        | 2     | 810.52, 723.49, 419.25, 283.26, 152.99                                                                                                         | Phosphatidylserine And Derivatives       |
| 1-Octadecanoyl-sn-glycero-3-phosphocholine                                                                    | Negative        | Kidney | 524.2686      | 12.63 | PC(18:0/16:0)                                                  | [M-H] <sup>-</sup>        | 2     | 524.26, 437.26, 152.99                                                                                                                         | Phosphatidylcholine And Derivatives      |
| 11Z-octadecanoyl-2-docosahexaenoyl-sn-glycero-3-phosphoethanolamine                                           | Negative        | Kidney | 464.3138      | 8.52  | PE(18:0/22:6)                                                  | [M-H] <sup>-</sup>        | 2     | 464.31, 367.27, 270.4, 196.0388, 140.0125, 78.9594                                                                                             | Phosphatidylethanolamine And Derivatives |
| cs-5,8,11,17-Eicosapentaenoic acid                                                                            | Positive        | Kidney | 303.2307      | 8.38  | Eicosaepentaenoic acid                                         | [M+H] <sup>+</sup>        | 2     | 303.23, 163.14, 147.17, 121.1, 96.07                                                                                                           | Fatty Acids And Derivatives              |
| 2-Oleoyl-1-palmitoyl-sn-glycero-3-phosphocholine                                                              | Positive        | Kidney | 762.5704      | 10.25 | PC(16:0/18:1)                                                  | [M+H] <sup>+</sup>        | 2     | 762.57, 184.07, 86.09                                                                                                                          | Phosphatidylcholine And Derivatives      |
| DL-Phenylalanine                                                                                              | Positive        | Kidney | 166.0862      | 1.1   | Phe                                                            | [M+H] <sup>+</sup>        | 1     | 166.08, 120.08, 103.05                                                                                                                         | Amino Acids And Derivatives              |
| Niacinamide                                                                                                   | Positive        | Kidney | 137.0462      | 0.72  | Hypoxanthine                                                   | [M+H] <sup>+</sup>        | 1     | 137.27, 137.04, 119.03, 110.03, 82.01                                                                                                          | Miscellaneous                            |
| 1-Palmitoyl-sn-glycero-3-phosphocholine                                                                       | Positive        | Kidney | 123.0415      | 0.69  | Niacinamide                                                    | [M+H] <sup>+</sup>        | 1     | 123.04, 96.04,                                                                                                                                 |                                          |

|                                                           |          |        |          |       |                |          |   |                                              |                                          |
|-----------------------------------------------------------|----------|--------|----------|-------|----------------|----------|---|----------------------------------------------|------------------------------------------|
| 1-Heptadecanoyl-sn-glycero-3-phosphocholine               | Positive | Spleen | 510.355  | 7.9   | LysoPC(17:0)   | IM+H+    | 2 | 510.35, 184.07, 124.99, 104.1, 88.09         | Phosphatidylcholine And Derivative       |
| 1-Behenoyl-2-hydroxy-sn-glycero-3-phosphocholine          | Positive | Spleen | 580.3577 | 9.64  | LysoPC(22:0)   | IM+H+    | 2 | 580.35, 184.07, 104.07                       | Phosphatidylcholine And Derivative       |
| 1-Palmitoyl-2-hydroxy-sn-glycero-3-phosphoethanolamine    | Positive | Spleen | 476.2793 | 7.46  | LysoPE(16:0)   | IM+H+    | 2 | 476.27, 433.23                               | Phosphatidylethanolamine And Derivatives |
| N-Acetyl-L-phenylalanine                                  | Positive | Spleen | 165.0544 | 0.71  | N-Ac-Phe       | IM+Ac+   | 2 | 165.08, 149.05, 120.08, 103.05, 93.06, 77.03 | Amino Acids And Derivatives              |
| 1-Myristoyl-2-palmitoyl-sn-glycero-3-phosphocholine       | Positive | Spleen | 706.5434 | 10.3  | PC(14:0/16:0)  | IM+H+    | 2 | 706.54, 184.07, 86.09                        | Phosphatidylcholine And Derivative       |
| 2-Oleoyl-1-palmitoyl-sn-glycero-3-phosphocholine          | Positive | Spleen | 760.5845 | 10.36 | PC(16:0/18:1)  | IM+H+    | 2 | 760.58, 184.07                               | Phosphatidylcholine And Derivative       |
| 1,2-Dipalmitoleoyl-sn-glycero-3-phosphocholine            | Positive | Spleen | 730.544  | 10.2  | PC(16:1/16:1)  | IM+H+    | 2 | 730.54, 184.07                               | Phosphatidylcholine                      |
| 1-Octadecanoyl-2-octadecenoyl-sn-glycero-3-phosphocholine | Positive | Spleen | 810.6004 | 10.33 | PC(18:0/18:1)  | IM+H+    | 2 | 810.58, 751.52, 184.07, 146.98               | Phosphatidylcholine And Derivative       |
| 1-Docosahexanoyl-2-stearoyl-sn-glycero-3-phosphocholine   | Positive | Spleen | 834.5996 | 10.25 | PC(18:0/22:6)  | IM+H+    | 2 | 834.599, 184.07                              | Phosphatidylcholine And Derivative       |
| 1-Oleoyl-2-myristoyl-sn-glycero-3-phosphocholine          | Positive | Spleen | 732.5573 | 10.3  | PC(18:1/14:0)  | IM+H+    | 2 | 732.55, 184.07                               | Phosphatidylcholine And Derivative       |
| 1-(12-Octadecenyl)-sn-glycero-3-phosphocholine            | Positive | Spleen | 508.372  | 7.89  | PC(18:0/0:0)   | IM+H+    | 2 | 508.37, 184.07, 125, 104.1, 86.09            | Phosphatidylcholine And Derivative       |
| N-Oleoyl-D-erythro-sphingosylphosphorylcholine            | Positive | Spleen | 729.5727 | 10.38 | SM(d18:1/18:1) | IM+H+    | 2 | 729.59, 184.07                               | Sphingomyelin                            |
| N-(Octadecanoyl)sphing-4-enine-1-phosphocholine           | Positive | Spleen | 731.5945 | 10.43 | SM(d18:1/18:0) | IM+H+    | 2 | 731.6, 184.07                                | Sphingomyelin(s)                         |
| Tauroursodeoxycholic acid                                 | Positive | Spleen | 482.324  | 8.33  | Taurolite      | IM+H+DD+ | 2 | 482.30, 464.31                               | Bile Acid Conjugates                     |



**Supplementary Table 2. Radiation effects Metabolites**  
**Radiation effect at SD 4 and SD 9 for validated metabolites across all tissues**

| Name                               | Matrix | Ionization Mode | SD 4     |                  |             |                       | SD 9     |          |             |                       |   |            |
|------------------------------------|--------|-----------------|----------|------------------|-------------|-----------------------|----------|----------|-------------|-----------------------|---|------------|
|                                    |        |                 | p-value  | FDR <sup>a</sup> | Rad/Vehicle |                       | p-value  | FDR      | Rad/Vehicle |                       |   |            |
|                                    |        |                 |          |                  | Fold Change | log <sub>2</sub> (FC) |          |          | Fold Change | log <sub>2</sub> (FC) |   |            |
| PC(16:0/18:2)                      | Heart  | Positive        | 2.97E-04 | 5.20E-03         | 0.78077     | ↓                     | -0.35704 | NS       | NS          | 1.0147                | ↑ | 0.020996   |
| PC(16:0/20:5)                      | Heart  | Positive        | 1.17E-02 | NS               | 0.86089     | ↓                     | -0.2161  | NS       | NS          | 0.84106               | ↓ | -0.24972   |
| Arachidonoyl Thio-PC               | Heart  | Positive        | NS       | NS               | 0.92349     | ↓                     | -0.11484 | 4.12E-03 | NS          | 1.2167                | ↑ | 0.28302    |
| PC(16:1/16:1)                      | Heart  | Positive        | 1.34E-03 | 1.46E-02         | 0.75197     | ↓                     | -0.41125 | NS       | NS          | 0.89575               | ↓ | -0.15884   |
| PE(18:0/22:6)                      | Heart  | Positive        | 5.45E-04 | 7.79E-03         | 1.4382      | ↑                     | 0.52426  | NS       | NS          | 1.0307                | ↑ | 0.043632   |
| PC(16:0/18:0)                      | Heart  | Positive        | 4.71E-03 | 4.02E-02         | 1.4114      | ↑                     | 0.4971   | NS       | NS          | 1.0014                | ↑ | 0.0019827  |
| Cervonic acid                      | Heart  | Positive        | 7.94E-05 | 2.58E-03         | 0.32755     | ↓                     | -1.6102  | NS       | NS          | 0.93464               | ↓ | -0.097513  |
| Methyl oleoylethanolamide          | Heart  | Positive        | 3.89E-07 | 5.44E-04         | 0.30528     | ↓                     | -1.7118  | 2.15E-04 | NS          | 0.59437               | ↓ | -0.75057   |
| DELTA.17-U-46619                   | Heart  | Positive        | 3.67E-02 | NS               | 0.71799     | ↓                     | -0.47797 | NS       | NS          | 0.93877               | ↓ | -0.091156  |
| PC(22:6/18:0)                      | Heart  | Positive        | 2.57E-03 | 2.45E-02         | 1.3541      | ↑                     | 0.43735  | NS       | NS          | 0.93759               | ↓ | -0.092976  |
| Acetylcarnitine                    | Heart  | Positive        | NS       | NS               | 1.3238      | ↑                     | 0.40464  | 3.51E-02 | NS          | 0.7238                | ↓ | -0.46634   |
| PC(16:0/22:6)                      | Heart  | Positive        | 5.41E-03 | 4.51E-02         | 1.1827      | ↑                     | 0.2421   | NS       | NS          | 0.93659               | ↓ | -0.094508  |
| Adrenic Acid (22:4, n-6)           | Heart  | Positive        | 2.32E-02 | NS               | 0.56321     | ↓                     | -0.82825 | NS       | NS          | 0.92045               | ↓ | -0.11959   |
| γ-Homolinolenic acid               | Heart  | Positive        | 3.87E-04 | 6.27E-03         | 0.52484     | ↓                     | -0.93004 | NS       | NS          | 0.86201               | ↓ | -0.21423   |
| DL-Norvaline                       | Heart  | Positive        | 2.02E-02 | NS               | 0.68375     | ↓                     | -0.54846 | 5.63E-03 | NS          | 0.71433               | ↓ | -0.48533   |
| 2-AG                               | Heart  | Positive        | 1.89E-03 | 1.89E-02         | 0.34981     | ↓                     | -1.5154  | NS       | NS          | 0.87715               | ↓ | -0.18911   |
| Eicosadienoic acid                 | Heart  | Positive        | 2.47E-04 | 4.61E-03         | 0.36406     | ↓                     | -1.4577  | NS       | NS          | 0.81349               | ↓ | -0.2978    |
| LyoPE(16:0)                        | Heart  | Positive        | 5.53E-03 | 4.53E-02         | 0.432       | ↓                     | -1.2109  | NS       | NS          | 0.68951               | ↓ | -0.53636   |
| Gln                                | Heart  | Positive        | 2.52E-02 | NS               | 1.5181      | ↑                     | 0.60222  | NS       | NS          | 0.88803               | ↓ | -0.17132   |
| 7α,12α-Dihydroxycholest-4-en-3-one | Heart  | Positive        | 8.37E-05 | 2.60E-03         | 0.23422     | ↓                     | -2.0941  | NS       | NS          | 0.86757               | ↓ | -0.20495   |
| Methyl ricinoleate                 | Heart  | Positive        | 5.91E-04 | 8.20E-03         | 0.39619     | ↓                     | -1.3357  | NS       | NS          | 1.1194                | ↑ | 0.16277    |
| Methyl DPA                         | Heart  | Positive        | 2.11E-03 | 2.09E-02         | 0.37005     | ↓                     | -1.4342  | NS       | NS          | 0.9106                | ↓ | -0.13512   |
| Erucamide                          | Heart  | Positive        | 1.56E-02 | NS               | 0.65836     | ↓                     | -0.60306 | NS       | NS          | 0.98585               | ↓ | -0.020563  |
| 9(10)-EpOME                        | Heart  | Positive        | 1.70E-03 | 1.76E-02         | 0.52731     | ↓                     | -0.92328 | 4.89E-04 | NS          | 0.61706               | ↓ | -0.69653   |
| N-Arachidonoyl-L-alanine           | Heart  | Positive        | 1.07E-04 | 3.02E-03         | 0.24252     | ↓                     | -2.0438  | 3.18E-02 | NS          | 0.632                 | ↓ | -0.66201   |
| 2-Linoleoylglycerol                | Heart  | Positive        | 5.98E-05 | 2.28E-03         | 0.44597     | ↓                     | -1.165   | NS       | NS          | 0.79351               | ↓ | -0.33369   |
| PC(16:0/20:4)                      | Spleen | Negative        | 1.68E-04 | 1.74E-03         | 1.2985      | ↑                     | 0.3769   | 1.70E-03 | 1.08E-02    | 1.2121                | ↑ | 0.27752    |
| PS(16:0/18:1)                      | Spleen | Negative        | 2.01E-06 | 4.94E-05         | 0.67875     | ↓                     | -0.55905 | 1.86E-04 | 1.83E-03    | 0.74331               | ↓ | -0.42797   |
| PC(16:0/18:2)                      | Spleen | Negative        | 3.29E-03 | 1.85E-02         | 1.2725      | ↑                     | 0.34772  | 2.52E-03 | 1.47E-02    | 1.2789                | ↑ | 0.35487    |
| PS(18:0/20:4)                      | Spleen | Negative        | 5.27E-03 | 2.63E-02         | 1.1937      | ↑                     | 0.25539  | NS       | NS          | 1.1608                | ↑ | 0.21508    |
| PE(16:0/18:2)                      | Spleen | Negative        | 2.01E-05 | 3.18E-04         | 0.61356     | ↓                     | -0.70473 | 4.74E-02 | NS          | 0.82721               | ↓ | -0.27368   |
| Cervonic acid                      | Spleen | Negative        | NS       | NS               | 0.94012     | ↓                     | -0.08908 | 1.41E-02 | NS          | 1.7704                | ↑ | 0.82409    |
| PE(18:0/20:4)                      | Spleen | Negative        | 3.71E-03 | 2.00E-02         | 0.64323     | ↓                     | -0.6366  | NS       | NS          | 0.99501               | ↓ | -0.0072137 |
| ω-3 Arachidonic acid               | Spleen | Negative        | NS       | NS               | 1.3311      | ↑                     | 0.41259  | 1.18E-02 | 4.93E-02    | 1.8112                | ↑ | 0.85694    |
| PS(18:0/18:2)                      | Spleen | Negative        | 2.07E-05 | 3.26E-04         | 0.74614     | ↓                     | -0.42248 | NS       | NS          | 0.87768               | ↓ | -0.18823   |
| PE(P-18:0/22:6)                    | Spleen | Negative        | NS       | NS               | 0.83069     | ↓                     | -0.26762 | 5.76E-03 | 2.78E-02    | 1.6116                | ↑ | 0.6885     |
| PS(16:0/20:4)                      | Spleen | Negative        | 8.89E-05 | 1.06E-03         | 0.75224     | ↓                     | -0.41073 | 3.92E-05 | 5.03E-04    | 0.67253               | ↓ | -0.57232   |
| Glu                                | Spleen | Negative        | 8.42E-05 | 1.02E-03         | 0.74132     | ↓                     | -0.43183 | 1.27E-05 | 2.15E-04    | 0.63469               | ↓ | -0.65587   |
| PS(18:0/22:6)                      | Spleen | Negative        | NS       | NS               | 1.081       | ↑                     | 0.11232  | 4.67E-02 | NS          | 1.1478                | ↑ | 0.19883    |

|                            |        |          |          |          |         |   |           |          |          |         |   |            |
|----------------------------|--------|----------|----------|----------|---------|---|-----------|----------|----------|---------|---|------------|
| PE(16:0/20:4)              | Spleen | Negative | 2.70E-05 | 4.01E-04 | 0.72991 | ↓ | -0.4542   | 2.22E-04 | 2.12E-03 | 0.79107 | ↓ | -0.33812   |
| Asp                        | Spleen | Negative | 2.72E-02 | NS       | 0.83364 | ↓ | -0.26251  | 1.38E-05 | 2.25E-04 | 0.60256 | ↓ | -0.73083   |
| PE(P-18:0/22:6)            | Spleen | Negative | 7.08E-05 | 9.06E-04 | 0.4727  | ↓ | -1.081    | NS       | NS       | 0.72367 | ↓ | -0.4666    |
| Mannose 6-Phosphate        | Spleen | Negative | 1.26E-02 | NS       | 0.77305 | ↓ | -0.37137  | 1.67E-02 | NS       | 0.78248 | ↓ | -0.35387   |
| GLR                        | Spleen | Positive | 2.70E-03 | 1.90E-02 | 1.3355  | ↑ | 0.41738   | 1.68E-03 | 1.31E-02 | 1.4569  | ↑ | 0.54293    |
| PC(18:0/22:6)              | Spleen | Positive | NS       | NS       | 1.0089  | ↑ | 0.012813  | 2.04E-02 | NS       | 0.88795 | ↓ | -0.17145   |
| Hypoxanthine               | Spleen | Positive | 1.15E-04 | 1.88E-03 | 0.58217 | ↓ | -0.7805   | 6.34E-07 | 1.62E-05 | 0.50178 | ↓ | -0.99489   |
| PC(16:1/16:1)              | Spleen | Positive | 1.75E-09 | 6.75E-07 | 0.63929 | ↓ | -0.64545  | 1.12E-08 | 6.46E-07 | 0.62086 | ↓ | -0.68767   |
| LysoPC(17:0)               | Spleen | Positive | 4.28E-02 | NS       | 0.75044 | ↓ | -0.4142   | NS       | NS       | 0.99466 | ↓ | -0.0077273 |
| N-Ac-Phe                   | Spleen | Positive | 5.69E-03 | 3.18E-02 | 1.3291  | ↑ | 0.41041   | NS       | NS       | 1.1312  | ↑ | 0.17791    |
| LysoPE(16:0)               | Spleen | Positive | 6.75E-04 | 7.46E-03 | 0.68664 | ↓ | -0.54237  | NS       | NS       | 1.1791  | ↑ | 0.23769    |
| PC(14:0/16:0)              | Spleen | Positive | 7.57E-05 | 1.34E-03 | 0.62695 | ↓ | -0.67359  | 1.06E-04 | 1.23E-03 | 0.7469  | ↓ | -0.42102   |
| 11-HEDE                    | Spleen | Positive | NS       | NS       | 1.3256  | ↑ | 0.40661   | 1.01E-02 | NS       | 1.8189  | ↑ | 0.86304    |
| PC(18:0/18:1)□             | Spleen | Positive | 1.57E-02 | NS       | 1.152   | ↑ | 0.20418   | NS       | NS       | 0.91465 | ↓ | -0.12871   |
| L-Valine                   | Spleen | Positive | 9.29E-07 | 4.93E-05 | 0.58216 | ↓ | -0.7805   | 1.64E-09 | 1.21E-07 | 0.47058 | ↓ | -1.0875    |
| Arachidonic acid           | Spleen | Positive | NS       | NS       | 1.4092  | ↑ | 0.49487   | 3.81E-03 | 2.59E-02 | 1.7899  | ↑ | 0.83984    |
| Taurolite                  | Spleen | Positive | 3.84E-03 | 2.42E-02 | 0.63292 | ↓ | -0.6599   | NS       | NS       | 1.3122  | ↑ | 0.39194    |
| DCHA-PAF                   | Spleen | Positive | 1.48E-05 | 3.95E-04 | 0.79423 | ↓ | -0.33237  | 7.03E-09 | 4.51E-07 | 0.71489 | ↓ | -0.48421   |
| LysoPC(22:0)               | Spleen | Positive | NS       | NS       | 0.92673 | ↓ | -0.10978  | NS       | NS       | 1.0466  | ↑ | 0.065654   |
| PC(18:1/14:0)              | Spleen | Positive | 2.46E-03 | 1.81E-02 | 0.85126 | ↓ | -0.23232  | 5.38E-06 | 9.40E-05 | 0.77067 | ↓ | -0.37581   |
| SM(d18:1/18:1)             | Spleen | Positive | 4.78E-05 | 9.38E-04 | 1.3619  | ↑ | 0.44565   | 2.18E-05 | 3.18E-04 | 1.32    | ↑ | 0.40051    |
| GSSG                       | Spleen | Positive | 2.38E-02 | NS       | 0.60964 | ↓ | -0.71397  | 1.59E-03 | 1.26E-02 | 0.47616 | ↓ | -1.0705    |
| SM(d18:1/18:0)             | Spleen | Positive | NS       | NS       | 1.154   | ↑ | 0.20658   | 3.72E-02 | NS       | 1.1948  | ↑ | 0.25678    |
| PC(P-18:0/0:0)             | Spleen | Positive | 2.54E-06 | 1.04E-04 | 0.37062 | ↓ | -1.432    | 1.33E-04 | 1.46E-03 | 0.34645 | ↓ | -1.5293    |
| Arg                        | Spleen | Positive | 1.01E-06 | 5.10E-05 | 1.8313  | ↑ | 0.87288   | 2.29E-05 | 3.26E-04 | 1.7485  | ↑ | 0.80608    |
| 3-Indolylactic acid        | Spleen | Positive | 1.44E-05 | 3.89E-04 | 0.61113 | ↓ | -0.71044  | 1.90E-06 | 3.88E-05 | 0.63671 | ↓ | -0.6513    |
| Glu                        | Kidney | Negative | NS       | NS       | 0.97058 | ↓ | -0.043084 | 1.03E-06 | 1.65E-04 | 0.80399 | ↓ | -0.31476   |
| 2-Hydroxypalmitic acid     | Kidney | Negative | 2.75E-02 | NS       | 0.78839 | ↓ | -0.34301  | NS       | NS       | 1.0588  | ↑ | 0.082458   |
| Citric Acid                | Kidney | Negative | NS       | NS       | 0.57417 | ↓ | -0.80044  | 1.78E-02 | NS       | 2.6207  | ↑ | 1.3899     |
| Cervonic acid              | Kidney | Negative | NS       | NS       | 0.93407 | ↓ | -0.098398 | 1.32E-02 | NS       | 1.354   | ↑ | 0.43726    |
| LysoPE(16:0)               | Kidney | Negative | NS       | NS       | 0.90602 | ↓ | -0.14239  | 3.08E-04 | 6.50E-03 | 1.4798  | ↑ | 0.56538    |
| PE(P-18:0/22:6)            | Kidney | Negative | NS       | NS       | 1.0761  | ↑ | 0.10579   | 3.66E-03 | 3.45E-02 | 1.6061  | ↑ | 0.68357    |
| PS(18:0/22:6)              | Kidney | Negative | 3.42E-02 | NS       | 0.87227 | ↓ | -0.19716  | NS       | NS       | 0.91973 | ↓ | -0.12071   |
| Phenaceturic acid          | Kidney | Negative | 3.56E-02 | NS       | 1.6147  | ↑ | 0.69123   | 9.40E-03 | NS       | 4.0261  | ↑ | 2.0094     |
| Asp                        | Kidney | Negative | NS       | NS       | 0.92302 | ↓ | -0.11557  | 2.19E-02 | NS       | 0.8859  | ↓ | -0.17478   |
| Carbocyclic thromboxane A2 | Kidney | Negative | 1.99E-03 | NS       | 0.55164 | ↓ | -0.8582   | 1.86E-03 | 2.16E-02 | 1.6133  | ↑ | 0.69002    |
| PS(18:0/0:0)               | Kidney | Negative | NS       | NS       | 1.1147  | ↑ | 0.15663   | 6.99E-07 | 1.49E-04 | 3.1595  | ↑ | 1.6597     |
| LysoPC(18:0)               | Kidney | Negative | 2.04E-02 | NS       | 0.74492 | ↓ | -0.42485  | NS       | NS       | 0.95544 | ↓ | -0.065766  |
| PC(18:0/18:1)              | Kidney | Positive | 1.83E-02 | NS       | 1.1309  | ↑ | 0.17746   | 1.09E-03 | 1.38E-02 | 1.2546  | ↑ | 0.32719    |
| Eicosapentaenoic acid      | Kidney | Positive | 1.31E-02 | NS       | 0.69474 | ↓ | -0.52546  | NS       | NS       | 0.9571  | ↓ | -0.063263  |
| PC(16:1/16:1)              | Kidney | Positive | NS       | NS       | 1.0702  | ↑ | 0.097882  | 1.84E-02 | NS       | 0.86814 | ↓ | -0.204     |
| PC(P-18:0/20:4)            | Kidney | Positive | NS       | NS       | 0.96158 | ↓ | -0.056528 | 2.01E-06 | 1.86E-04 | 0.62983 | ↓ | -0.66697   |
| Arachidonoyl Thio-PC       | Kidney | Positive | NS       | NS       | 1.0747  | ↑ | 0.10387   | 1.14E-02 | NS       | 1.1696  | ↑ | 0.22597    |
| PC(O-16:0/22:6)            | Kidney | Positive | NS       | NS       | 0.98209 | ↓ | -0.026068 | 2.24E-06 | 1.86E-04 | 0.64166 | ↓ | -0.64012   |
| LysoPC(O-18:0)             | Kidney | Positive | NS       | NS       | 0.68534 | ↓ | -0.54512  | 1.81E-02 | NS       | 1.4744  | ↑ | 0.56009    |

|              |        |          |    |    |         |                                                                                               |          |          |        |                                                                                     |         |
|--------------|--------|----------|----|----|---------|-----------------------------------------------------------------------------------------------|----------|----------|--------|-------------------------------------------------------------------------------------|---------|
| LysoPC(16:0) | Kidney | Positive | NS | NS | 0.94716 |  -0.078316 | 1.96E-03 | 1.99E-02 | 1.2897 |  | 0.36706 |
|--------------|--------|----------|----|----|---------|-----------------------------------------------------------------------------------------------|----------|----------|--------|-------------------------------------------------------------------------------------|---------|

*Note.* All metabolite names are validated through tandem MS.

<sup>a</sup> Numbers are FDR adjusted *P* values. NS = not significant (FDR, *P* > 0.05).

## Supplementary Table 3. Radiation effects Pathways

**Radiation dysregulation pathways****Table 3A**

| <b>Heart</b><br>Pathway              | <b>SD 4</b>         |                | <b>SD 9</b>         |                |
|--------------------------------------|---------------------|----------------|---------------------|----------------|
|                                      | <i>overlap size</i> | <i>p-value</i> | <i>overlap size</i> | <i>p-value</i> |
| De novo fatty acid biosynthesis      | 17(23)              | 8.40E-05       | -                   | -              |
| Fatty acid activation                | 11(15)              | 6.72E-04       | 3(15)               | 3.45E-02       |
| Arachidonic acid metabolism          | 7(9)                | 3.61E-03       | -                   | -              |
| Leukotriene metabolism               | 7(9)                | 3.61E-03       | 3(9)                | 6.89E-03       |
| Omega-3 fatty acid metabolism        | -                   | -              | 2(4)                | 8.65E-03       |
| Fatty Acid Metabolism                | 6(8)                | 8.82E-03       | -                   | -              |
| Limonene and pinene degradation      | 7(10)               | 8.91E-03       | -                   | -              |
| Bile acid biosynthesis               | -                   | -              | 4(17)               | 9.41E-03       |
| Linoleate metabolism                 | -                   | -              | 3(12)               | 1.66E-02       |
| Saturated fatty acids beta-oxidation | 4(5)                | 1.75E-02       | -                   | -              |
| Xenobiotics metabolism               | 4(5)                | 1.75E-02       | -                   | -              |

*Note.* Pathway analysis result with positive mode and negative mode combined.

<sup>a</sup> Numbers in parenthesis indicates the pathway size.

**Table 3B**

| <b>Spleen</b><br>Pathway                            | <b>SD 4</b>         |                | <b>SD 9</b>         |                |
|-----------------------------------------------------|---------------------|----------------|---------------------|----------------|
|                                                     | <i>overlap size</i> | <i>p-value</i> | <i>overlap size</i> | <i>p-value</i> |
| Tyrosine metabolism                                 | 12(16)              | 8.40E-05       | -                   | -              |
| Pyrimidine metabolism                               | 3(3)                | 9.24E-03       | 14(16)              | 5.04E-04       |
| Glycine, serine, alanine and threonine metabolism   | 9(14)               | 3.32E-02       | 12(14)              | 1.51E-03       |
| Glycerophospholipid metabolism                      | -                   | -              | 15(19)              | 2.02E-03       |
| Fructose and mannose metabolism                     | 6(6)                | 2.27E-03       | 5(6)                | 4.92E-02       |
| Beta-Alanine metabolism                             | 6(6)                | 2.27E-03       | 6(6)                | 7.06E-03       |
| Glycolysis and Gluconeogenesis                      | 4(4)                | 2.35E-03       | 7(7)                | 3.36E-03       |
| Alanine and Aspartate Metabolism                    | 6(7)                | 8.91E-03       | 7(7)                | 3.36E-03       |
| Vitamin B9 (folate) metabolism                      | -                   | -              | 7(7)                | 3.36E-03       |
| Aspartate and asparagine metabolism                 | 5(7)                | 1.36E-02       | 11(13)              | 3.70E-03       |
| Urea cycle/amino group metabolism                   | 5(6)                | 4.20E-03       | 8(10)               | 2.12E-02       |
| Vitamin B3 (nicotinate and nicotinamide) metabolism | -                   | -              | 6(6)                | 7.06E-03       |
| Pentose phosphate pathway                           | -                   | -              | 8(9)                | 7.48E-03       |
| Valine, leucine and isoleucine degradation          | 3(3)                | 9.24E-03       | 3(3)                | 1.62E-02       |
| Aminosugars metabolism                              | 3(3)                | 9.24E-03       | 3(3)                | 1.62E-02       |
| Lysine metabolism                                   | 3(3)                | 9.24E-03       | 3(3)                | 1.62E-02       |
| Tryptophan metabolism                               | 7(9)                | 1.18E-02       | 7(9)                | 3.66E-02       |
| TCA cycle                                           | 4(4)                | 1.31E-02       | 4(4)                | 3.00E-02       |
| Carbon fixation                                     | -                   | -              | 5(5)                | 1.43E-02       |
| Glycosphingolipid biosynthesis - globoseries        | -                   | -              | 5(5)                | 1.43E-02       |
| Fatty acid activation                               | -                   | -              | 5(7)                | 2.21E-02       |
| Methionine and cysteine metabolism                  | 4(6)                | 3.71E-02       | 9(12)               | 2.69E-02       |
| Butanoate metabolism                                | 2(2)                | 3.68E-02       | 6(7)                | 2.71E-02       |

|                                                 |      |          |      |          |
|-------------------------------------------------|------|----------|------|----------|
| Ascorbate (Vitamin C) and Aldarate Metabolism   | -    | -        | 6(7) | 2.71E-02 |
| Glutamate metabolism                            | 3(4) | 3.94E-02 | 6(7) | 2.71E-02 |
| Galactose metabolism                            | -    | -        | 6(7) | 2.71E-02 |
| Glycosphingolipid biosynthesis - neolactoseries | -    | -        | 4(4) | 3.00E-02 |
| Keratan sulfate biosynthesis                    | -    | -        | 4(4) | 3.00E-02 |
| O-Glycan biosynthesis                           | -    | -        | 4(4) | 3.00E-02 |
| Propanoate metabolism                           | -    | -        | 4(4) | 3.00E-02 |
| Glycosphingolipid biosynthesis - lactoseries    | -    | -        | 4(4) | 3.00E-02 |
| Blood Group Biosynthesis                        | -    | -        | 4(4) | 3.00E-02 |
| Sialic acid metabolism                          | -    | -        | 7(9) | 3.66E-02 |
| N-Glycan biosynthesis                           | 2(2) | 3.68E-02 | 7(9) | 3.66E-02 |
| Arginine and Proline Metabolism                 | 2(2) | 3.68E-02 | -    | -        |
| Glutathione Metabolism                          | -    | -        | 5(6) | 4.92E-02 |

*Note.* Pathway analysis result with positive mode and negative mode combined.

<sup>a</sup> Numbers in parenthesis indicates the pathway size.

**Table 3C**

| <b>Kidney</b><br><b>Pathway</b>                   | <b>SD 4</b>         |                | <b>SD 9</b>         |                |
|---------------------------------------------------|---------------------|----------------|---------------------|----------------|
|                                                   | <b>overlap size</b> | <b>p-value</b> | <b>overlap size</b> | <b>p-value</b> |
| Alanine and Aspartate Metabolism                  | 6(7)                | 1.68E-04       | 5(7)                | 3.42E-02       |
| Ascorbate (Vitamin C) and Aldarate Metabolism     | -                   | -              | 8(8)                | 4.20E-04       |
| Aspartate and asparagine metabolism               | 8(15)               | 1.34E-03       | -                   | -              |
| Glycolysis and Gluconeogenesis                    | 5(7)                | 1.68E-03       | 6(7)                | 6.05E-03       |
| De novo fatty acid biosynthesis                   | 4(11)               | 2.52E-03       | -                   | -              |
| Vitamin A (retinol) metabolism                    | 3(9)                | 1.09E-02       | 5(9)                | 2.77E-03       |
| Purine metabolism                                 | -                   | -              | 10(14)              | 3.53E-03       |
| Vitamin B1 (thiamin) metabolism                   | 3(3)                | 3.53E-03       | -                   | -              |
| Omega-3 fatty acid metabolism                     | 3(3)                | 3.53E-03       | -                   | -              |
| Pyruvate Metabolism                               | -                   | -              | 5(5)                | 3.70E-03       |
| Methionine and cysteine metabolism                | -                   | -              | 8(11)               | 7.73E-03       |
| Aminosugars metabolism                            | 5(9)                | 8.23E-03       | -                   | -              |
| Arginine and Proline Metabolism                   | 5(9)                | 8.23E-03       | 6(9)                | 3.33E-02       |
| Heparan sulfate degradation                       | -                   | -              | 4(4)                | 9.83E-03       |
| Histidine metabolism                              | 3(4)                | 1.34E-02       | -                   | -              |
| Butanoate metabolism                              | 5(10)               | 1.34E-02       | -                   | -              |
| Beta-Alanine metabolism                           | -                   | -              | 5(6)                | 1.40E-02       |
| Hexose phosphorylation                            | 2(2)                | 2.13E-02       | -                   | -              |
| Glycerophospholipid metabolism                    | 7(19)               | 2.57E-02       | -                   | -              |
| Sialic acid metabolism                            | 4(8)                | 2.59E-02       | -                   | -              |
| Glycine, serine, alanine and threonine metabolism | -                   | -              | 8(13)               | 2.66E-02       |
| Chondroitin sulfate degradation                   | -                   | -              | 3(3)                | 2.67E-02       |
| Fructose and mannose metabolism                   | 2(3)                | 4.68E-02       | 3(3)                | 2.67E-02       |
| Glyoxylate and Dicarboxylate Metabolism           | -                   | -              | 3(3)                | 2.67E-02       |
| Glutathione Metabolism                            | 2(3)                | 4.68E-02       | 3(3)                | 2.67E-02       |
| Vitamin B9 (folate) metabolism                    | 3(5)                | 2.72E-02       | 1(1)                | 4.00E-02       |

|                          |       |          |        |          |
|--------------------------|-------|----------|--------|----------|
| Glutamate metabolism     | -     | -        | 4(5)   | 3.34E-02 |
| Leukotriene metabolism   | -     | -        | 2(4)   | 3.88E-02 |
| Tyrosine metabolism      | -     | -        | 12(23) | 3.91E-02 |
| Vitamin K metabolism     | -     | -        | 1(1)   | 4.00E-02 |
| Lysine metabolism        | 3(6)  | 4.34E-02 | -      | -        |
| N-Glycan biosynthesis    | 3(6)  | 4.34E-02 | -      | -        |
| Propanoate metabolism    | 3(6)  | 4.34E-02 | -      | -        |
| Alkaloid biosynthesis II | 2(3)  | 4.68E-02 | -      | -        |
| Tryptophan metabolism    | 4(10) | 4.89E-02 | -      | -        |

*Note.* Pathway analysis result with positive mode and negative mode combined.

<sup>a</sup> Numbers in parenthesis indicates the pathway size.





| Item | Quantity | Unit | Description |
|------|----------|------|-------------|
| ...  | ...      | ...  | ...         |

| Item | Quantity | Unit | Description |
|------|----------|------|-------------|
| ...  | ...      | ...  | ...         |

| Item | Quantity | Unit | Description |
|------|----------|------|-------------|
| ...  | ...      | ...  | ...         |

1. The first part of the document is a list of names and titles, including the names of the authors and the titles of their works. This list is organized in a structured manner, likely following a specific format or convention.

2. The second part of the document is a list of names and titles, similar to the first part, but with different content. This section also appears to be organized in a structured manner.

3. The third part of the document is a list of names and titles, continuing the structured format. This section contains a different set of names and titles compared to the previous sections.

Supplementary Table 4. Metabolic Changes due to amifostine treatment (side effects)

**TABLE 4A**

**Amifostine 50mg side effect in SD 4 for validated metabolites across all tissues**

| <b>Name</b>            | <b>Organ/Tissue</b> | <b>p-value</b> | <b>FDR<sup>a</sup></b> | <b>Fold Change</b> | <b>Log2(FC)</b> |
|------------------------|---------------------|----------------|------------------------|--------------------|-----------------|
| PC(16:0/18:2)          | Heart               | 5.16E-04       | NS                     | 1.2581             | ↑ 0.3313        |
| PC(16:0/20:5)          | Heart               | 1.46E-03       | NS                     | 1.22               | ↑ 0.28685       |
| Arachidonoyl Thio-PC   | Heart               | 3.06E-03       | NS                     | 1.2112             | ↑ 0.27642       |
| PC(16:0/18:1)          | Heart               | 9.31E-03       | NS                     | 1.2973             | ↑ 0.3755        |
| 5'-Adenylic acid       | Heart               | 2.01E-02       | NS                     | 1.6784             | ↑ 0.74711       |
| PC(16:1/16:1)          | Heart               | 3.62E-02       | NS                     | 1.3142             | ↑ 0.3942        |
| PC(16:0/20:4)          | Spleen              | 4.00E-02       | NS                     | 1.1496             | ↑ 0.20108       |
| LysoPE(18:0)           | Kidney              | 9.80E-04       | NS                     | 0.75206            | ↓ -0.41108      |
| Glu                    | Kidney              | 3.64E-03       | NS                     | 1.1143             | ↑ 0.15609       |
| 2-Hydroxypalmitic acid | Kidney              | 4.13E-03       | NS                     | 1.4594             | ↑ 0.54533       |
| Citric Acid            | Kidney              | 5.11E-03       | NS                     | 3.4518             | ↑ 1.7873        |
| PC(16:0/20:4)          | Kidney              | 8.73E-03       | NS                     | 1.5163             | ↑ 0.60052       |
| PC(16:0/18:2)          | Kidney              | 1.31E-02       | NS                     | 1.4881             | ↑ 0.57346       |
| Cervonic acid          | Kidney              | 2.44E-02       | NS                     | 0.77093            | ↓ -0.37532      |
| PC(16:0/22:6)          | Kidney              | 2.91E-02       | NS                     | 1.2456             | ↑ 0.3168        |
| PI(18:0/20:4)          | Kidney              | 3.63E-02       | NS                     | 1.8556             | ↑ 0.8919        |
| PC(18:1/16:0)          | Kidney              | 4.10E-02       | NS                     | 1.1882             | ↑ 0.24875       |
| LysoPE(16:0)           | Kidney              | 4.31E-02       | NS                     | 0.86704            | ↓ -0.20584      |
| 14(15)-EpEDE           | Kidney              | 4.91E-02       | NS                     | 0.78772            | ↓ -0.34424      |
| PC(18:0/22:6)          | Kidney              | 4.94E-02       | NS                     | 1.3458             | ↑ 0.42849       |

*Note.* All metabolite names are validated through tandem MS.

<sup>a</sup> Numbers are FDR adjusted *P* values. NS = not significant (FDR, *P* value > 0.05).

**TABLE 4B****Amifostine 200mg side effect in SD 4 for validated metabolites across all tissues**

| <b>Name</b>     | <b>Organ/Tissue</b> | <b><i>p</i>-value</b> | <b><i>FDR</i><sup>a</sup></b> | <b><i>Fold Change</i></b> |   | <b><i>Log2(FC)</i></b> |
|-----------------|---------------------|-----------------------|-------------------------------|---------------------------|---|------------------------|
| PC(16:0/18:1)   | Heart               | 5.24E-03              | <i>NS</i>                     | 1.2747                    | ↑ | 0.35012                |
| Cer(d18:1/20:0) | Heart               | 2.98E-02              | <i>NS</i>                     | 0.47695                   | ↓ | -1.0681                |
| PG(16:0/18:1)   | Heart               | 2.83E-02              | <i>NS</i>                     | 0.51327                   | ↓ | -0.96222               |
| PG(18:1/18:1)   | Heart               | 2.08E-02              | <i>NS</i>                     | 0.55572                   | ↓ | -0.84757               |
| LysoPE(18:0)    | Kidney              | 1.03E-03              | <i>NS</i>                     | 0.82492                   | ↓ | -0.27767               |
| Glu             | Kidney              | 3.28E-02              | <i>NS</i>                     | 1.1272                    | ↑ | 0.17274                |
| PS(16:0/20:4)   | Kidney              | 2.18E-02              | <i>NS</i>                     | 0.84246                   | ↓ | -0.24732               |

*Note.* All metabolite names are validated through tandem MS.

<sup>a</sup> Numbers are FDR adjusted *P* values. *NS* = not significant (FDR, *P* value > 0.05).

TABLE 4C

## Amifostine 50mg side effect in SD 9 for validated metabolites across all tissues

| Name                       | Organ/Tissue | <i>p</i> -value | FDR <sup>a</sup> | Fold Change | Log <sub>2</sub> (FC) |
|----------------------------|--------------|-----------------|------------------|-------------|-----------------------|
| PC(16:0/18:2)              | Heart        | 5.40E-04        | NS               | 1.2244      | ↑ 0.29208             |
| Arachidonoyl Thio-PC       | Heart        | 1.41E-02        | NS               | 1.1389      | ↑ 0.18765             |
| PC(16:1/16:1)              | Heart        | 2.85E-02        | NS               | 1.2215      | ↑ 0.28864             |
| DELTA.17-U-46619           | Heart        | 2.40E-03        | NS               | 0.73629     | ↓ -0.44165            |
| γ-Homolinolenic acid       | Heart        | 4.51E-02        | NS               | 0.8078      | ↓ -0.30792            |
| LysoPC(18:0)               | Heart        | 4.81E-02        | NS               | 0.72867     | ↓ -0.45666            |
| Erucamide                  | Heart        | 2.16E-02        | NS               | 1.176       | ↑ 0.23391             |
| PC(18:0/18:1)              | Heart        | 3.54E-02        | NS               | 1.9092      | ↑ 0.93298             |
| PS(18:0/18:1)              | Spleen       | 1.85E-02        | NS               | 1.1983      | ↑ 0.26101             |
| PS(16:0/20:4)              | Spleen       | 3.53E-02        | NS               | 0.88142     | ↓ -0.18211            |
| PE(16:0/20:4)              | Spleen       | 2.33E-02        | NS               | 0.89713     | ↓ -0.15661            |
| PC(14:0/16:0)              | Spleen       | 3.17E-02        | NS               | 1.1618      | ↑ 0.21639             |
| LysoPC(22:0)               | Spleen       | 2.43E-02        | NS               | 1.0872      | ↑ 0.12057             |
| LysoPE(18:0)               | Kidney       | 3.48E-02        | NS               | 0.85927     | ↓ -0.21882            |
| PC(18:1/16:0)              | Kidney       | 1.18E-02        | NS               | 1.1101      | ↑ 0.15064             |
| 14(15)-EpEDE               | Kidney       | 1.74E-02        | NS               | 0.80136     | ↓ -0.31947            |
| PS(16:0/20:4)              | Kidney       | 1.27E-02        | NS               | 1.1808      | ↑ 0.23982             |
| PC(16:0/18:0)              | Kidney       | 4.91E-02        | NS               | 1.1042      | ↑ 0.143               |
| PS(18:0/22:6)              | Kidney       | 1.34E-02        | NS               | 1.1979      | ↑ 0.26055             |
| Asp                        | Kidney       | 3.58E-03        | NS               | 0.81293     | ↓ -0.2988             |
| Carbocyclic thromboxane A2 | Kidney       | 2.14E-02        | NS               | 0.73809     | ↓ -0.43814            |
| Arachidonic acid           | Kidney       | 1.07E-02        | NS               | 0.78308     | ↓ -0.35276            |
| Arachidonoyl Thio-PC       | Kidney       | 1.40E-02        | NS               | 1.0897      | ↑ 0.12395             |
| PC(16:0/20:5)              | Kidney       | 2.41E-02        | NS               | 1.0965      | ↑ 0.13285             |
| Phe                        | Kidney       | 2.95E-02        | NS               | 0.68777     | ↓ -0.53999            |

Note. All metabolite names are validated through tandem MS.

<sup>a</sup> Numbers are FDR adjusted *P* values. NS = not significant (FDR, *P* value > 0.05).

TABLE 4D

## Amifostine 200mg side effect in SD 9 for validated metabolites across all tissues

| Name            | Organ/Tissue | <i>p</i> -value | FDR <sup>a</sup> | Fold Change |   | Log <sub>2</sub> (FC) |
|-----------------|--------------|-----------------|------------------|-------------|---|-----------------------|
| PS(18:0/18:1)   | Spleen       | 2.44E-03        | NS               | 1.2932      | ↑ | 0.37091               |
| PS(18:0/18:2)   | Spleen       | 1.56E-02        | NS               | 1.1701      | ↑ | 0.2266                |
| PE(16:0/20:4)   | Spleen       | 2.42E-02        | NS               | 0.90067     | ↓ | -0.15093              |
| PC(16:0/18:1)   | Spleen       | 1.94E-02        | NS               | 0.93569     | ↓ | -0.095905             |
| N-Ac-Phe        | Spleen       | 5.57E-03        | NS               | 0.74393     | ↓ | -0.42675              |
| L-Valine        | Spleen       | 2.30E-02        | NS               | 0.88045     | ↓ | -0.18369              |
| LysoPC(22:0)    | Spleen       | 4.85E-02        | NS               | 1.0959      | ↑ | 0.13212               |
| SM(d18:1/18:0)  | Spleen       | 2.46E-02        | NS               | 1.2121      | ↑ | 0.2775                |
| Arg             | Spleen       | 7.72E-04        | NS               | 0.78418     | ↓ | -0.35074              |
| Citric Acid     | Kidney       | 2.05E-02        | NS               | 1.7349      | ↑ | 0.79481               |
| PC(P-18:0/20:4) | Kidney       | 9.57E-05        | 3.76E-02         | 0.78413     | ↓ | -0.35084              |
| PC(18:1/14:0)   | Kidney       | 3.54E-02        | NS               | 1.1501      | ↑ | 0.20177               |
| PC(O-16:0/22:6) | Kidney       | 8.92E-04        | NS               | 0.8362      | ↓ | -0.25808              |

Note. All metabolite names are validated through tandem MS.

<sup>a</sup> Numbers are FDR adjusted *P* values. NS = not significant (FDR, *P* value > 0.05).

TABLE 4E  
Amifostine side effect in SD4 and SD9 for validated metabolites across all tissues

| Matrix | Mode     | mz_rt          | Name                               | SD4      |          |             |         | SD4       |          |             |         | SD9     |            |             |          | SD9     |     |             |          |          |         |   |            |
|--------|----------|----------------|------------------------------------|----------|----------|-------------|---------|-----------|----------|-------------|---------|---------|------------|-------------|----------|---------|-----|-------------|----------|----------|---------|---|------------|
|        |          |                |                                    | p.value  | FDR      | Fold.Change | log2.FC | p.value   | FDR      | Fold.Change | log2.FC | p.value | FDR        | Fold.Change | log2.FC  | p.value | FDR | Fold.Change | log2.FC  |          |         |   |            |
| Heart  | Positive | 758.5699_9.87  | PC(16:0/18:2)                      | 5.16E-04 | 9.35E-01 | 1.2581      | ↑       | 0.3313    | 2.47E-01 | 8.07E-01    | 1.1056  | ↑       | 0.14481    | 5.40E-04    | 6.07E-01 | 1.2244  | ↑   | 0.29208     | 7.07E-01 | 9.98E-01 | 0.98332 | ↓ | -0.024263  |
| Heart  | Positive | 780.5537_9.7   | PC(16:0/20:5)                      | 1.46E-03 | 9.35E-01 | 1.22        | ↑       | 0.28685   | 5.93E-01 | 9.92E-01    | 1.049   | ↑       | 0.069056   | 4.60E-01    | 9.92E-01 | 1.0451  | ↑   | 0.063572    | 6.52E-01 | 9.97E-01 | 0.96989 | ↓ | -0.0441    |
| Heart  | Positive | 784.5823_9.86  | Arachidonoyl Thio-PC               | 3.06E-03 | 9.35E-01 | 1.2112      | ↑       | 0.27642   | 1.89E-01 | 7.50E-01    | 1.1192  | ↑       | 0.16243    | 1.41E-02    | 6.07E-01 | 1.1389  | ↑   | 0.18765     | 5.80E-01 | 9.97E-01 | 0.97134 | ↓ | -0.041954  |
| Heart  | Positive | 760.5854_9.96  | PC(16:0/18:1)                      | 9.31E-03 | 9.35E-01 | 1.2973      | ↑       | 0.3755    | 5.24E-03 | 5.18E-01    | 1.2747  | ↑       | 0.35012    | 5.79E-01    | 8.07E-01 | 1.0391  | ↑   | 0.055322    | 9.44E-02 | 9.97E-01 | 0.83565 | ↓ | -0.25903   |
| Heart  | Positive | 348.0715_0.45  | 5'-Adenylic acid                   | 2.01E-02 | 9.35E-01 | 1.6784      | ↑       | 0.74711   | 1.46E-01 | 6.88E-01    | 1.3899  | ↑       | 0.47497    | 1.62E-01    | 6.14E-01 | 0.77276 | ↓   | -0.3719     | 2.90E-01 | 9.97E-01 | 0.83727 | ↓ | -0.25623   |
| Heart  | Positive | 730.5382_9.74  | PC(16:1/16:1)                      | 3.62E-02 | 9.35E-01 | 1.3142      | ↑       | 0.3942    | 2.60E-01 | 8.27E-01    | 1.1554  | ↑       | 0.2084     | 2.85E-02    | 6.07E-01 | 1.2215  | ↑   | 0.28864     | 2.60E-01 | 9.97E-01 | 0.94585 | ↓ | -0.080312  |
| Heart  | Positive | 792.5703_9.89  | PE(18:0/22:6)                      | 6.91E-02 | 9.35E-01 | 1.2064      | ↑       | 0.27066   | 1.65E-01 | 7.22E-01    | 1.1611  | ↑       | 0.21554    | 6.65E-01    | 7.98E-01 | 1.0642  | ↑   | 0.089767    | 2.42E-01 | 9.97E-01 | 0.8794  | ↓ | -0.1854    |
| Heart  | Positive | 762.5126_9.67  | PC(16:0/18:0)                      | 1.07E-01 | 9.35E-01 | 1.1988      | ↓       | 0.26157   | 3.03E-01 | 8.76E-01    | 1.1218  | ↑       | 0.16576    | 5.29E-01    | 7.87E-01 | 0.9441  | ↓   | -0.082987   | 3.24E-01 | 9.97E-01 | 0.90227 | ↓ | -0.14837   |
| Heart  | Positive | 329.2477_7.48  | Cervonic acid                      | 1.11E-01 | 9.35E-01 | 0.68047     | ↓       | -0.55541  | 2.42E-01 | 8.06E-01    | 0.76975 | ↓       | -0.37754   | 9.61E-01    | 9.85E-01 | 1.0436  | ↑   | 0.061564    | 1.82E-01 | 9.97E-01 | 1.299   | ↑ | 0.37744    |
| Heart  | Positive | 323.2528_8.15  | Methyl oleoylethanolamide          | 1.34E-01 | 9.35E-01 | 0.77541     | ↓       | -0.36698  | 5.87E-02 | 5.51E-01    | 0.6974  | ↓       | -0.51995   | 1.07E-01    | 6.07E-01 | 0.8618  | ↓   | -0.21458    | 5.64E-01 | 9.97E-01 | 1.2331  | ↑ | 0.30234    |
| Heart  | Positive | 331.2637_8.11  | DELTA-17-U-46619                   | 1.58E-01 | 9.35E-01 | 0.83772     | ↓       | -0.25546  | 3.04E-01 | 8.76E-01    | 0.87018 | ↓       | -0.20062   | 2.40E-03    | 6.07E-01 | 0.73629 | ↓   | -0.44165    | 4.77E-01 | 9.97E-01 | 0.94134 | ↓ | -0.087213  |
| Heart  | Positive | 137.047_0.47   | Hypoxanthine                       | 1.65E-01 | 9.35E-01 | 0.91312     | ↓       | -0.13113  | 6.89E-01 | 9.92E-01    | 0.97225 | ↓       | -0.040602  | 8.04E-01    | 9.10E-01 | 1.0226  | ↑   | 0.032244    | 5.45E-01 | 9.97E-01 | 1.0548  | ↑ | 0.076954   |
| Heart  | Positive | 482.3248_7.43  | LysoPE(18:0)                       | 1.78E-01 | 9.35E-01 | 1.2461      | ↑       | 0.31739   | 1.36E-01 | 6.71E-01    | 1.3886  | ↑       | 0.47366    | 1.83E-01    | 6.17E-01 | 0.79026 | ↓   | -0.3396     | 6.07E-02 | 9.97E-01 | 0.69171 | ↓ | -0.53177   |
| Heart  | Positive | 575.5029_10.8  | Cer(18:1/20:0)                     | 2.18E-01 | 9.35E-01 | 0.64473     | ↓       | -0.63323  | 2.98E-02 | 5.18E-01    | 0.47695 | ↓       | -1.0681    | 9.40E-01    | 9.73E-01 | 1.2587  | ↑   | 0.33193     | 2.64E-01 | 9.97E-01 | 1.2511  | ↑ | 0.32316    |
| Heart  | Positive | 771.5146_11.04 | PG(16:0/18:1)                      | 2.26E-01 | 9.35E-01 | 0.692       | ↓       | -0.53116  | 2.83E-02 | 5.18E-01    | 0.51327 | ↓       | -0.96222   | 7.15E-01    | 8.74E-01 | 1.4849  | ↑   | 0.57036     | 1.51E-01 | 9.97E-01 | 1.5267  | ↑ | 0.61039    |
| Heart  | Positive | 797.5311_11.06 | PC(18:1/18:1)                      | 2.39E-01 | 9.35E-01 | 0.75435     | ↓       | -0.40669  | 2.08E-02 | 5.18E-01    | 0.55572 | ↓       | -0.84757   | 5.56E-01    | 7.97E-01 | 1.5086  | ↑   | 0.59319     | 3.53E-01 | 9.97E-01 | 1.3023  | ↑ | 0.38109    |
| Heart  | Positive | 834.6007_9.89  | PC(22:6/18:0)                      | 2.63E-01 | 9.35E-01 | 1.1077      | ↓       | 0.14759   | 6.22E-01 | 9.92E-01    | 1.0556  | ↓       | 0.078041   | 8.79E-01    | 9.40E-01 | 1.0201  | ↑   | 0.028768    | 1.98E-01 | 9.97E-01 | 0.89432 | ↓ | -0.16114   |
| Heart  | Positive | 342.203_9.11   | Methyl DHA                         | 2.72E-01 | 9.35E-01 | 0.88443     | ↓       | -0.17719  | 7.87E-01 | 9.92E-01    | 1.0133  | ↑       | 0.019082   | 8.29E-01    | 9.18E-01 | 1.0207  | ↑   | 0.029514    | 7.25E-01 | 9.98E-01 | 0.95388 | ↓ | -0.068123  |
| Heart  | Positive | 991.6712_6.71  | LysoPC(16:0)                       | 2.89E-01 | 9.35E-01 | 1.5493      | ↓       | 0.63159   | 3.03E-01 | 8.76E-01    | 1.4619  | ↑       | 0.54782    | 1.09E-01    | 6.07E-01 | 0.57649 | ↓   | -0.79463    | 6.63E-01 | 9.98E-01 | 1.1085  | ↑ | 0.1486     |
| Heart  | Positive | 357.2772_8.79  | Monolein                           | 3.49E-01 | 9.37E-01 | 0.62002     | ↓       | -0.6896   | 5.81E-01 | 9.92E-01    | 1.2685  | ↑       | 0.3431     | 4.99E-01    | 6.77E-01 | 0.73636 | ↓   | -0.44152    | 9.52E-01 | 9.98E-01 | 1.0012  | ↑ | 0.0017887  |
| Heart  | Positive | 204.1241_0.44  | Acetylcarnitine                    | 3.53E-01 | 9.37E-01 | 1.1591      | ↑       | 0.21294   | 9.99E-01 | 1.00E+00    | 1.0387  | ↑       | 0.054815   | 1.78E-01    | 6.17E-01 | 0.84473 | ↓   | -0.24343    | 6.43E-01 | 9.97E-01 | 1.0002  | ↑ | 0.00031755 |
| Heart  | Positive | 793.5039_11.59 | PG(18:2)                           | 3.54E-01 | 9.37E-01 | 0.87509     | ↓       | -0.1925   | 2.42E-01 | 8.06E-01    | 0.84751 | ↓       | -0.23869   | 6.66E-01    | 8.50E-01 | 1.3006  | ↑   | 0.3792      | 2.29E-01 | 9.97E-01 | 1.3558  | ↑ | 0.43918    |
| Heart  | Positive | 806.5694_9.78  | PC(16:0/22:6)                      | 3.56E-01 | 9.37E-01 | 1.0462      | ↓       | 0.065137  | 9.41E-01 | 9.92E-01    | 1.0049  | ↑       | 0.0070508  | 7.26E-01    | 8.78E-01 | 1.0292  | ↑   | 0.041546    | 2.81E-01 | 9.97E-01 | 0.93958 | ↓ | -0.089915  |
| Heart  | Positive | 333.2791_8.5   | Adrenic Acid (22:4, n-6)           | 3.94E-01 | 9.44E-01 | 1.2249      | ↑       | 0.2927    | 6.45E-01 | 9.92E-01    | 1.176   | ↑       | 0.2339     | 6.89E-02    | 6.07E-01 | 0.77551 | ↓   | -0.36678    | 8.46E-01 | 9.98E-01 | 1.0489  | ↑ | 0.068906   |
| Heart  | Positive | 148.0049_0.43  | Glu                                | 4.10E-01 | 9.44E-01 | 1.0425      | ↑       | 0.059994  | 7.91E-01 | 9.92E-01    | 1.0115  | ↑       | 0.016534   | 9.87E-02    | 6.07E-01 | 0.93105 | ↓   | -0.10307    | 6.15E-01 | 9.97E-01 | 0.98348 | ↓ | -0.02403   |
| Heart  | Positive | 307.2588_8.32  | γ-Homolinolenic acid               | 4.69E-01 | 9.54E-01 | 0.88044     | ↓       | -0.18436  | 8.47E-01 | 9.92E-01    | 0.97687 | ↓       | -0.033755  | 4.51E-02    | 6.07E-01 | 0.8078  | ↓   | -0.30792    | 6.00E-01 | 9.98E-01 | 1.0428  | ↑ | 0.060452   |
| Heart  | Positive | 118.0874_0.43  | DL-Norvaline                       | 5.05E-01 | 9.54E-01 | 1.0537      | ↓       | 0.07548   | 8.22E-01 | 9.92E-01    | 0.93975 | ↓       | -0.089652  | 2.15E-01    | 6.22E-01 | 1.1254  | ↑   | 0.17049     | 1.50E-01 | 9.97E-01 | 1.1501  | ↑ | 0.2017     |
| Heart  | Positive | 287.2357_8.02  | N-Arachidonoyl-L-serine            | 5.27E-01 | 9.54E-01 | 0.94674     | ↓       | -0.078955 | 8.03E-01 | 9.92E-01    | 0.94941 | ↓       | -0.0073657 | 2.51E-01    | 6.22E-01 | 0.85299 | ↓   | -0.2294     | 4.70E-01 | 9.97E-01 | 0.91992 | ↓ | -0.12041   |
| Heart  | Positive | 379.2825_8.14  | 2-AG                               | 5.50E-01 | 9.55E-01 | 1.2014      | ↓       | 0.26473   | 8.77E-01 | 9.92E-01    | 0.98246 | ↓       | -0.02553   | 9.56E-01    | 9.82E-01 | 1.0585  | ↑   | 0.081988    | 2.39E-01 | 9.97E-01 | 1.3179  | ↑ | 0.39827    |
| Heart  | Positive | 291.2665_8.27  | Eicosadienoic acid                 | 5.92E-01 | 9.55E-01 | 0.83194     | ↓       | -0.26545  | 8.24E-01 | 9.92E-01    | 0.94069 | ↓       | -0.088213  | 5.53E-01    | 7.95E-01 | 0.92196 | ↓   | -0.11722    | 8.86E-01 | 9.98E-01 | 1.1031  | ↑ | 0.14152    |
| Heart  | Positive | 454.3896_6.9   | LysoPE(16:0)                       | 6.02E-01 | 9.55E-01 | 1.3115      | ↑       | 0.39126   | 8.99E-01 | 9.92E-01    | 1.1871  | ↑       | 0.24748    | 5.93E-01    | 8.15E-01 | 1.2946  | ↑   | 0.33864     | 4.60E-01 | 9.97E-01 | 1.2728  | ↑ | 0.34803    |
| Heart  | Positive | 147.0776_0.44  | Gln                                | 6.18E-01 | 9.55E-01 | 1.0568      | ↓       | 0.079707  | 9.90E-01 | 9.99E-01    | 0.97741 | ↓       | -0.032958  | 1.54E-01    | 6.12E-01 | 0.83081 | ↓   | -0.2674     | 6.52E-01 | 9.97E-01 | 1.0521  | ↑ | 0.073315   |
| Heart  | Positive | 162.1136_0.41  | L-Carnitine                        | 6.86E-01 | 9.57E-01 | 0.96072     | ↓       | -0.057816 | 4.87E-01 | 9.84E-01    | 1.0913  | ↑       | 0.12609    | 5.50E-01    | 7.95E-01 | 1.066   | ↑   | 0.092172    | 6.28E-02 | 9.97E-01 | 1.2444  | ↑ | 0.31542    |
| Heart  | Positive | 524.3713_7.46  | LysoPC(18:0)                       | 6.97E-01 | 9.57E-01 | 1.0648      | ↑       | 0.090599  | 1.93E-01 | 7.56E-01    | 1.1767  | ↑       | 0.23472    | 4.81E-02    | 6.07E-01 | 0.72867 | ↓   | -0.45666    | 2.83E-01 | 9.97E-01 | 0.88169 | ↓ | -0.18166   |
| Heart  | Positive | 400.2676_7.69  | 7α,12α-Dihydroxycholest-4-en-3-one | 7.09E-01 | 9.57E-01 | 0.99648     | ↓       | -0.005088 | 3.36E-01 | 9.06E-01    | 0.77863 | ↓       | -0.361     | 8.95E-01    | 9.50E-01 | 1.0957  | ↑   | 0.13187     | 2.38E-01 | 9.97E-01 | 1.4677  | ↑ | 0.55358    |
| Heart  | Positive | 305.2484_8.02  | Arachidonic acid                   | 7.13E-01 | 9.57E-01 | 0.96396     | ↓       | -0.052951 | 7.42E-01 | 9.92E-01    | 0.9745  | ↓       | -0.037267  | 1.67E-01    | 6.17E-01 | 0.86114 | ↓   | -0.21568    | 3.98E-01 | 9.97E-01 | 0.91735 | ↓ | -0.12446   |
| Heart  | Positive | 132.0778_0.42  | Creatine                           | 7.26E-01 | 9.57E-01 | 1.0272      | ↓       | 0.038706  | 8.12E-01 | 9.92E-01    | 1.0234  | ↑       | 0.033331   | 1.74E-01    | 6.17E-01 | 0.8643  | ↓   | -0.21039    | 8.24E-01 | 9.98E-01 | 1.03    | ↑ | 0.042586   |
| Heart  | Positive | 313.2739_8.01  | Methyl ricinoleate                 | 7.56E-01 | 9.61E-01 | 0.91811     | ↓       | -0.12326  | 8.02E-01 | 9.92E-01    | 0.9081  | ↓       | -0.13908   | 2.96E-01    | 6.42E-01 | 1.134   | ↑   | 0.18136     | 9.13E-01 | 9.98E-01 | 1.1004  | ↑ | 0.13808    |
| Heart  | Positive | 344.2587_8.67  | Methyl DPA                         | 7.82E-01 | 9.62E-01 | 0.87658     | ↓       | -0.19003  | 5.80E-01 | 9.92E-01    | 0.82852 | ↓       | -0.2714    | 6.26E-01    | 8.29E-01 | 0.93951 | ↓   | -0.090015   | 2.92E-01 | 9.97E-01 | 1.2519  | ↑ | 0.32414    |
| Heart  | Positive | 338.1829_8.61  | Erucamide                          | 7.88E-01 | 9.62E-01 | 1.0194      | ↓       | 0.027651  | 6.43E-01 | 9.92E-01    | 0.92871 | ↓       | -0.10671   | 2.16E-02    | 6.07E-01 | 1.176   | ↑   | 0.23391     | 6.92E-02 | 9.97E-01 | 1.186   | ↑ | 0.24608    |
| Heart  | Positive | 279.2321_7.69  | 9(10)-EpOME                        | 8.02E-01 | 9.65E-01 | 0.9063      | ↓       | -0.058443 | 8.46E-01 | 9.92E-01    | 0.95757 | ↓       | -0.062557  | 5.26E-01    | 7.87E-01 | 0.94477 | ↓   | -0.081961   | 6.       |          |         |   |            |



|        |          |                |                        |          |          |         |   |           |          |          |         |   |           |          |          |         |   |           |          |          |         |   |           |
|--------|----------|----------------|------------------------|----------|----------|---------|---|-----------|----------|----------|---------|---|-----------|----------|----------|---------|---|-----------|----------|----------|---------|---|-----------|
| Spleen | Negative | 464.312_7.87   | PE(P-18:0/22:6)        | 7.92E-01 | 9.15E-01 | 1.007   | ↑ | 0.010034  | 7.22E-01 | 1.00E+00 | 1.0974  | ↑ | 0.13403   | 7.46E-01 | 9.96E-01 | 1.0638  | ↑ | 0.089205  | 8.98E-01 | 9.65E-01 | 0.96833 | ↓ | -0.046423 |
| Spleen | Negative | 259.0216_0.66  | Mannose 6-Phosphate    | 8.81E-01 | 9.52E-01 | 0.99162 | ↓ | -0.012141 | 5.19E-01 | 1.00E+00 | 0.95889 | ↓ | -0.06056  | 4.22E-01 | 9.96E-01 | 0.96006 | ↓ | -0.058808 | 1.59E-01 | 6.67E-01 | 1.0613  | ↑ | 0.085895  |
| Spleen | Positive | 173.0806_0.85  | GLR                    | 1.03E-01 | 8.05E-01 | 1.3186  | ↑ | 0.39902   | 2.03E-01 | 1.00E+00 | 1.1173  | ↑ | 0.16003   | 6.45E-01 | 9.19E-01 | 1.0289  | ↑ | 0.041114  | 3.78E-01 | 6.43E-01 | 1.0544  | ↑ | 0.076246  |
| Spleen | Positive | 760.5845_10.36 | PC(16:0/18:1)          | 1.63E-01 | 8.05E-01 | 0.95131 | ↓ | -0.072007 | 2.16E-01 | 1.00E+00 | 0.96703 | ↓ | -0.048365 | 5.62E-01 | 9.10E-01 | 0.98314 | ↓ | -0.024529 | 1.94E-02 | 2.36E-01 | 0.93569 | ↓ | -0.095905 |
| Spleen | Positive | 834.5996_10.25 | PC(18:0/22:6)          | 1.63E-01 | 8.05E-01 | 0.94283 | ↓ | -0.084926 | 4.29E-01 | 1.00E+00 | 0.97061 | ↓ | -0.043035 | 2.93E-01 | 7.76E-01 | 0.95519 | ↓ | -0.066146 | 2.59E-01 | 5.57E-01 | 0.95832 | ↓ | -0.061414 |
| Spleen | Positive | 137.0466_0.7   | Hypoxanthine           | 1.65E-01 | 8.05E-01 | 0.8846  | ↓ | -0.17691  | 6.76E-01 | 1.00E+00 | 0.9749  | ↓ | -0.036678 | 6.94E-01 | 9.24E-01 | 1.0312  | ↑ | 0.044357  | 3.05E-01 | 5.99E-01 | 0.93249 | ↓ | -0.10084  |
| Spleen | Positive | 730.544_10.2   | PC(16:1/16:1)          | 1.67E-01 | 8.05E-01 | 0.93346 | ↓ | -0.099333 | 2.06E-01 | 1.00E+00 | 0.9512  | ↓ | -0.07218  | 5.98E-01 | 9.10E-01 | 1.0193  | ↑ | 0.027559  | 1.89E-01 | 4.95E-01 | 0.94131 | ↓ | -0.087259 |
| Spleen | Positive | 510.355_7.9    | LysoPC(17:0)           | 1.71E-01 | 8.05E-01 | 0.83158 | ↓ | -0.26608  | 8.49E-01 | 1.00E+00 | 1.045   | ↑ | 0.06354   | 9.38E-01 | 9.83E-01 | 1.005   | ↑ | 0.0072156 | 1.38E-01 | 4.45E-01 | 0.84877 | ↓ | -0.23656  |
| Spleen | Positive | 165.0544_0.71  | N-Ac-Phe               | 2.42E-01 | 8.05E-01 | 0.86745 | ↓ | -0.20515  | 2.27E-01 | 1.00E+00 | 0.86717 | ↓ | -0.20562  | 5.17E-01 | 8.97E-01 | 0.92663 | ↓ | -0.10993  | 5.57E-03 | 1.79E-01 | 0.74393 | ↓ | -0.42675  |
| Spleen | Positive | 476.2791_7.46  | LysoPE(16:0)           | 3.09E-01 | 8.05E-01 | 0.89345 | ↓ | -0.16254  | 2.65E-01 | 1.00E+00 | 0.88799 | ↓ | -0.17138  | 3.65E-01 | 8.09E-01 | 1.0696  | ↑ | 0.097115  | 5.88E-01 | 7.92E-01 | 0.96557 | ↓ | -0.050545 |
| Spleen | Positive | 706.5434_10.3  | PC(14:0/16:0)          | 3.66E-01 | 8.05E-01 | 1.1005  | ↑ | 0.13822   | 3.49E-01 | 1.00E+00 | 0.9182  | ↓ | -0.12312  | 3.17E-02 | 6.16E-01 | 1.1618  | ↑ | 0.21639   | 1.55E-01 | 4.60E-01 | 1.0951  | ↑ | 0.13102   |
| Spleen | Positive | 307.2567_9.03  | 11-HEDE                | 3.70E-01 | 8.05E-01 | 0.79869 | ↓ | -0.3243   | 8.63E-01 | 1.00E+00 | 1.0377  | ↑ | 0.053411  | 5.82E-01 | 9.10E-01 | 0.92227 | ↓ | -0.11674  | 1.43E-01 | 4.49E-01 | 0.7888  | ↓ | -0.34226  |
| Spleen | Positive | 810.6004_10.33 | PC(18:0/18:1)          | 3.83E-01 | 8.05E-01 | 0.96396 | ↓ | -0.052951 | 6.43E-01 | 1.00E+00 | 1.016   | ↑ | 0.022857  | 1.18E-01 | 6.57E-01 | 0.92521 | ↓ | -0.11215  | 6.37E-02 | 3.41E-01 | 0.92758 | ↓ | -0.10846  |
| Spleen | Positive | 118.0867_0.67  | L-Valine               | 4.39E-01 | 8.05E-01 | 0.94248 | ↓ | -0.085473 | 1.62E-01 | 1.00E+00 | 0.91497 | ↓ | -0.1282   | 8.26E-01 | 9.63E-01 | 0.9848  | ↓ | -0.0221   | 2.30E-02 | 2.54E-01 | 0.88045 | ↓ | -0.18369  |
| Spleen | Positive | 305.2477_8.8   | Arachidonic acid       | 4.84E-01 | 8.05E-01 | 0.85912 | ↓ | -0.21907  | 7.66E-01 | 1.00E+00 | 1.051   | ↑ | 0.071748  | 6.01E-01 | 9.10E-01 | 0.93903 | ↓ | -0.090763 | 3.13E-01 | 6.05E-01 | 0.85615 | ↓ | -0.22407  |
| Spleen | Positive | 482.324_8.33   | Taurolite              | 4.93E-01 | 8.09E-01 | 0.94309 | ↓ | -0.084539 | 2.18E-01 | 1.00E+00 | 0.85035 | ↓ | -0.23387  | 8.17E-02 | 6.48E-01 | 1.1687  | ↑ | 0.2249    | 4.39E-01 | 6.62E-01 | 0.93822 | ↓ | -0.092003 |
| Spleen | Positive | 792.5738_10.28 | DCHA-PAF               | 5.51E-01 | 8.31E-01 | 0.97663 | ↓ | -0.034116 | 3.20E-01 | 1.00E+00 | 0.96288 | ↓ | -0.054577 | 1.26E-01 | 6.68E-01 | 1.0581  | ↑ | 0.081468  | 6.45E-02 | 3.43E-01 | 1.0457  | ↑ | 0.064516  |
| Spleen | Positive | 580.3577_9.64  | LysoPC(22:0)           | 5.62E-01 | 8.31E-01 | 0.96384 | ↓ | -0.05313  | 4.93E-01 | 1.00E+00 | 1.0751  | ↑ | 0.10443   | 2.43E-02 | 6.16E-01 | 1.0872  | ↑ | 0.12057   | 4.85E-02 | 3.17E-01 | 1.0959  | ↑ | 0.13212   |
| Spleen | Positive | 732.5571_10.3  | PC(18:1/14:0)          | 5.83E-01 | 8.43E-01 | 0.97668 | ↓ | -0.034039 | 6.46E-01 | 1.00E+00 | 0.98262 | ↓ | -0.025287 | 2.30E-01 | 7.49E-01 | 0.95258 | ↓ | -0.070092 | 1.01E-01 | 4.04E-01 | 0.94025 | ↓ | -0.088883 |
| Spleen | Positive | 729.5727_10.38 | SM(d18:1/18:1)         | 5.87E-01 | 8.43E-01 | 0.97548 | ↓ | -0.035822 | 7.84E-01 | 1.00E+00 | 0.989   | ↓ | -0.015953 | 1.02E-01 | 6.48E-01 | 1.0775  | ↑ | 0.10772   | 5.19E-02 | 3.27E-01 | 1.0916  | ↑ | 0.1265    |
| Spleen | Positive | 613.1586_0.69  | GSSG                   | 6.01E-01 | 8.43E-01 | 0.92028 | ↓ | -0.11985  | 7.83E-01 | 1.00E+00 | 1.0279  | ↑ | 0.039682  | 7.63E-01 | 9.48E-01 | 0.96174 | ↓ | -0.056278 | 5.35E-01 | 7.57E-01 | 0.91626 | ↓ | -0.12618  |
| Spleen | Positive | 731.5945_10.43 | SM(d18:1/18:0)         | 6.35E-01 | 8.57E-01 | 1.0451  | ↑ | 0.063611  | 7.65E-01 | 1.00E+00 | 0.95383 | ↓ | -0.068201 | 2.87E-01 | 7.73E-01 | 1.1122  | ↑ | 0.15337   | 2.46E-02 | 2.55E-01 | 1.2121  | ↑ | 0.2775    |
| Spleen | Positive | 508.372_7.89   | PC(P-18:0/0:0)         | 6.65E-01 | 8.69E-01 | 0.97003 | ↓ | -0.043899 | 8.68E-01 | 1.00E+00 | 1.1099  | ↑ | 0.15045   | 8.77E-01 | 9.72E-01 | 1.0332  | ↑ | 0.047172  | 5.51E-01 | 7.69E-01 | 0.92433 | ↓ | -0.11352  |
| Spleen | Positive | 175.0747_0.63  | Arg                    | 7.74E-01 | 9.17E-01 | 0.99096 | ↓ | -0.013101 | 1.72E-01 | 1.00E+00 | 0.8922  | ↓ | -0.16456  | 8.06E-02 | 6.46E-01 | 0.8875  | ↓ | -0.1721   | 7.72E-04 | 1.42E-01 | 0.78418 | ↓ | -0.35074  |
| Spleen | Positive | 206.0677_0.64  | 3-Indolylactic acid    | 8.33E-01 | 9.35E-01 | 0.98905 | ↓ | -0.015885 | 6.91E-01 | 1.00E+00 | 0.96955 | ↓ | -0.04461  | 8.8E-01  | 8.85E-01 | 1.0493  | ↑ | 0.069399  | 1.83E-01 | 4.91E-01 | 0.93719 | ↓ | -0.093594 |
| Kidney | Negative | 480.309_8.31   | LysoPE(18:0)           | 9.80E-04 | 9.60E-02 | 0.75206 | ↓ | -0.41108  | 1.03E-03 | 2.45E-01 | 0.82492 | ↓ | -0.27767  | 3.48E-02 | 2.51E-01 | 0.85927 | ↓ | -0.21882  | 8.58E-02 | 7.47E-01 | 0.87348 | ↓ | -0.19516  |
| Kidney | Negative | 146.045_0.62   | Gu                     | 3.64E-03 | 1.45E-01 | 1.1143  | ↑ | 0.15609   | 3.28E-02 | 9.66E-01 | 1.1272  | ↑ | 0.17274   | 5.35E-01 | 7.66E-01 | 0.97287 | ↓ | -0.039683 | 6.34E-01 | 9.98E-01 | 0.98583 | ↓ | -0.020594 |
| Kidney | Negative | 271.2269_8.59  | 2-Hydroxypalmitic acid | 4.13E-03 | 1.49E-01 | 1.4594  | ↑ | 0.54533   | 2.07E-01 | 9.66E-01 | 1.1066  | ↑ | 0.14612   | 8.24E-01 | 9.30E-01 | 0.98154 | ↓ | -0.026879 | 3.84E-01 | 9.98E-01 | 1.0736  | ↑ | 0.10241   |
| Kidney | Negative | 191.0187_0.7   | Citric Acid            | 5.11E-03 | 1.74E-01 | 3.1513  | ↑ | 1.7873    | 6.73E-02 | 9.66E-01 | 2.3504  | ↑ | 1.2329    | 5.80E-02 | 3.07E-01 | 1.4567  | ↑ | 0.54274   | 2.05E-02 | 4.77E-01 | 1.7349  | ↑ | 0.79481   |
| Kidney | Negative | 826.5608_10.2  | PC(16:0/20:4)          | 8.73E-03 | 2.15E-01 | 1.4548  | ↑ | 0.60052   | 9.09E-02 | 9.66E-01 | 1.2127  | ↑ | 0.27821   | 3.38E-01 | 5.20E-01 | 1.0954  | ↑ | 0.1315    | 6.82E-01 | 9.98E-01 | 1.0746  | ↑ | 0.10382   |
| Kidney | Negative | 802.5607_10.25 | PC(16:0/18:2)          | 1.31E-02 | 2.44E-01 | 1.4881  | ↑ | 0.57346   | 2.92E-01 | 9.66E-01 | 1.1622  | ↑ | 0.21686   | 1.59E-01 | 4.41E-01 | 1.1409  | ↑ | 0.19022   | 7.42E-01 | 9.98E-01 | 1.101   | ↑ | 0.13885   |
| Kidney | Negative | 327.232_8.65   | Cervonic acid          | 2.44E-02 | 2.90E-01 | 0.77093 | ↓ | -0.37532  | 3.40E-01 | 9.66E-01 | 0.90954 | ↓ | -0.13679  | 7.86E-02 | 3.33E-01 | 0.8488  | ↓ | -0.2365   | 6.16E-01 | 9.98E-01 | 1.0583  | ↑ | 0.081769  |
| Kidney | Negative | 850.5611_10.15 | PC(16:0/22:6)          | 2.91E-02 | 2.99E-01 | 1.2456  | ↑ | 0.3168    | 3.62E-01 | 9.66E-01 | 1.0922  | ↑ | 0.12719   | 1.40E-01 | 4.15E-01 | 1.0939  | ↑ | 0.12949   | 7.39E-01 | 9.98E-01 | 1.0409  | ↑ | 0.05787   |
| Kidney | Negative | 886.6084_10.37 | PI(18:0/20:4)          | 3.63E-02 | 3.03E-01 | 1.8556  | ↑ | 0.8919    | 3.08E-01 | 9.66E-01 | 1.27    | ↑ | 0.34486   | 8.07E-01 | 9.21E-01 | 0.97019 | ↓ | -0.043657 | 4.59E-01 | 9.98E-01 | 1.0532  | ↑ | 0.074831  |
| Kidney | Negative | 804.5756_10.35 | PC(18:1/16:0)          | 4.10E-02 | 3.07E-01 | 1.1882  | ↑ | 0.24875   | 1.38E-01 | 9.66E-01 | 1.1061  | ↑ | 0.14549   | 1.18E-02 | 9.16E-01 | 1.1101  | ↑ | 0.15064   | 2.50E-01 | 9.98E-01 | 1.0689  | ↑ | 0.096158  |
| Kidney | Negative | 452.2776_7.48  | LysoPE(16:0)           | 4.31E-02 | 3.13E-01 | 0.86704 | ↓ | -0.20584  | 8.33E-02 | 9.66E-01 | 0.91126 | ↓ | -0.13407  | 1.71E-01 | 4.56E-01 | 0.92278 | ↓ | -0.11595  | 7.52E-01 | 9.98E-01 | 0.98397 | ↓ | -0.023318 |
| Kidney | Negative | 303.2321_8.79  | 14(15)-EpeDE           | 4.91E-02 | 3.19E-01 | 0.78772 | ↓ | -0.34424  | 7.19E-01 | 9.77E-01 | 0.96238 | ↓ | -0.055323 | 1.74E-02 | 2.19E-01 | 0.80136 | ↓ | -0.31947  | 5.59E-01 | 9.98E-01 | 0.96071 | ↓ | -0.05782  |
| Kidney | Negative | 878.5919_10.26 | PC(18:0/22:6)          | 4.94E-02 | 3.19E-01 | 1.3458  | ↑ | 0.42849   | 5.11E-01 | 9.66E-01 | 1.0941  | ↑ | 0.1298    | 1.26E-01 | 4.03E-01 | 1.1689  | ↑ | 0.22519   | 8.06E-01 | 9.98E-01 | 1.0673  | ↑ | 0.093964  |
| Kidney | Negative | 781.4888_11.91 | PS(16:0/20:4)          | 9.32E-02 | 3.87E-01 | 0.86459 | ↓ | -0.20992  | 2.18E-02 | 9.66E-01 | 0.84246 | ↓ | -0.24732  | 1.27E-02 | 1.99E-01 | 1.1808  | ↑ | 0.23982   | 3.15E-01 | 9.98E-01 | 1.0794  | ↑ | 0.11027   |
| Kidney | Negative | 464.3138_8.52  | PE(P-18:0/22:6)        | 1.96E-01 | 4.85E-01 | 0.86057 | ↓ | -0.21664  | 2.00E-01 | 9.66E-01 | 0.90661 | ↓ | -0.15099  | 9.67E-01 | 9.91E-01 | 0.98366 | ↓ | -0.02377  | 6.20E-01 | 9.98E-01 | 1.0539  | ↑ | 0.075753  |
| Kidney | Negative | 790.5385_10.3  | PE(18:0/22:6)          | 2.64E-01 | 5.35E-01 | 0.86625 | ↓ | -0.20715  | 4.66E-01 | 9.66E-01 | 0.93951 | ↓ | -0.090027 | 3.32E-01 | 6.08E-01 | 1.0881  | ↑ | 0.12176   | 8.62E-01 | 9.98E-01 | 1.0394  | ↑ | 0.05701   |
| Kidney | Negative | 806.5851_10.39 | PC(16:0/18:0)          | 4.51E-01 | 6.70E-01 | 1.0709  | ↑ | 0.098806  | 6.26E-01 | 9.67E-01 | 1.0326  | ↑ | 0.046301  | 4.91E-02 | 2.85E-01 | 1.1042  | ↑ | 0.143     | 6.07E-01 | 9.98E-01 | 1.0277  | ↑ | 0.039425  |
| Kidney | Negative | 747.5197_10.26 | PG(16:0/18:1)          | 4.90E-01 | 7.05E-01 | 0.94616 | ↓ | -0.07985  | 9.07E-01 | 9.90E-01 | 0.99417 | ↓ | -0.008438 | 1.41E-01 | 4.15E-01 | 1.0872  | ↑ | 0.12067   | 4.69E-01 | 9.98E-01 | 1.0485  | ↑ | 0.068392  |
| Kidney | Negative | 834.5288_11.91 | PS(18:0/22:6)          | 4.94E-01 | 7.08E-01 | 0.94944 | ↓ | -0.074847 | 6.10E-01 | 9.67E-01 | 0.96447 | ↓ | -0.052194 | 1.34E-02 | 2.01E-01 | 1.1979  | ↑ | 0.26055   | 4.89E-01 | 9.98E-01 | 1.0451  | ↑ | 0.063578  |
| Kidney | Negative | 192.0654_3.15  | Phenacetic acid        | 5.46E-01 | 7.49E-01 | 1.1016  | ↑ | 0.13965   | 4.91E-01 | 9.66E-01 | 1.2544  | ↑ | 0.32697   | 3.02E-01 | 5.82E-01 | 1.4638  | ↑ | 0.54969   | 9.70E-01 | 9.98E-01 | 0.86383 | ↓ | -0.21118  |
| Kidney | Negative | 132.0292_0.62  | Asp                    | 6.67E-01 | 8.25E-01 | 0.97955 | ↓ | -0.029803 | 9.56     |          |         |   |           |          |          |         |   |           |          |          |         |   |           |



|                           |        |          |   |   |   |   |   |   |   |          |          |        |         |          |          |        |         |          |          |        |         |          |          |        |         |          |          |        |         |          |          |        |         |
|---------------------------|--------|----------|---|---|---|---|---|---|---|----------|----------|--------|---------|----------|----------|--------|---------|----------|----------|--------|---------|----------|----------|--------|---------|----------|----------|--------|---------|----------|----------|--------|---------|
| PC(18:0/22:6)             | Kidney | Negative | - | - | - | - | - | - | - | 6.98E-01 | 8.77E-01 | 1.0209 | 0.0298  | 2.59E-01 | 4.20E-01 | 0.8960 | -0.1585 | 4.37E-01 | 7.15E-01 | 0.9367 | -0.0944 | 5.10E-01 | 6.66E-01 | 0.9287 | -0.1068 | 3.56E-01 | 8.03E-01 | 1.2637 | 0.3377  | 1.91E-01 | 5.90E-01 | 1.3902 | 0.4753  |
| PS(16:0/20:4)             | Kidney | Negative | - | - | - | - | - | - | - | 2.40E-01 | 7.35E-01 | 0.9069 | -0.1410 | 3.91E-01 | 5.41E-01 | 0.9195 | -0.1211 | 3.79E-01 | 6.66E-01 | 1.0896 | 0.1238  | 6.83E-01 | 7.85E-01 | 1.0273 | 0.0388  | 6.21E-01 | 8.87E-01 | 0.9676 | -0.0476 | 4.32E-01 | 7.28E-01 | 0.9358 | -0.0957 |
| PE(18:0/22:6)             | Kidney | Negative | - | - | - | - | - | - | x | 3.91E-01 | 7.61E-01 | 1.0761 | 0.1058  | 3.59E-01 | 5.13E-01 | 1.0879 | 0.1215  | 7.41E-01 | 8.88E-01 | 1.0355 | 0.0504  | 3.66E-01 | 3.85E-02 | 1.6061 | 0.0336  | 4.33E-02 | 5.60E-01 | 0.7634 | -0.3894 | 1.73E-02 | 2.35E-01 | 0.6003 | -0.7362 |
| PE(18:0/22:6)             | Kidney | Negative | - | - | - | - | - | - | - | 1.77E-01 | 6.94E-01 | 0.8958 | -0.1587 | 3.06E-02 | 1.42E-01 | 0.8392 | -0.2530 | 9.58E-01 | 9.80E-01 | 1.0197 | 0.0282  | 6.78E-01 | 7.82E-01 | 0.9590 | -0.0605 | 8.34E-01 | 9.57E-01 | 0.9845 | -0.0225 | 5.88E-01 | 8.20E-01 | 1.0052 | 0.0075  |
| PG(16:0/18:0)             | Kidney | Negative | - | - | - | - | - | - | - | 7.21E-01 | 8.83E-01 | 1.0110 | 0.0158  | 1.28E-02 | 1.01E-01 | 0.9079 | -0.1393 | 5.14E-02 | 3.29E-01 | 0.9043 | -0.1451 | 8.22E-01 | 8.86E-01 | 0.9924 | -0.0110 | 8.52E-01 | 9.61E-01 | 0.9894 | -0.0154 | 2.26E-01 | 6.07E-01 | 0.8767 | -0.1899 |
| PG(16:0/18:1)             | Kidney | Negative | - | - | - | - | - | - | - | 7.63E-01 | 9.06E-01 | 1.0162 | 0.0232  | 3.13E-03 | 6.06E-02 | 0.8541 | -0.2276 | 9.35E-01 | 9.72E-01 | 1.0034 | 0.0049  | 6.72E-02 | 2.29E-01 | 0.8977 | -0.1557 | 3.27E-01 | 8.03E-01 | 1.0478 | 0.0674  | 7.41E-01 | 8.89E-01 | 1.0288 | 0.0499  |
| PS(18:0/22:6)             | Kidney | Negative | - | - | - | - | - | - | - | 3.42E-02 | 4.40E-01 | 0.8723 | -0.1972 | 1.79E-03 | 5.03E-02 | 0.8045 | -0.3139 | 9.76E-01 | 9.86E-01 | 1.0189 | 0.0270  | 2.67E-01 | 4.66E-01 | 0.9197 | -0.1207 | 2.39E-01 | 7.44E-01 | 0.9065 | -0.1416 | 4.26E-01 | 7.25E-01 | 0.9313 | -0.1026 |
| Phenacetic acid           | Kidney | Negative | - | - | - | - | - | - | - | 3.56E-02 | 4.42E-01 | 1.5147 | 0.6912  | 7.93E-01 | 8.53E-01 | 1.3144 | 0.3944  | 1.39E-01 | 4.53E-01 | 1.8027 | 0.8502  | 9.40E-03 | 7.05E-02 | 4.0261 | 2.0094  | 3.08E-01 | 7.92E-01 | 1.0913 | 0.1260  | 3.61E-01 | 6.94E-01 | 1.0333 | 0.0472  |
| Asp                       | Kidney | Negative | - | - | - | - | - | - | - | 9.18E-02 | 6.03E-01 | 0.9230 | -0.1156 | 1.42E-02 | 1.05E-01 | 1.1405 | -0.1896 | 4.41E-02 | 3.15E-01 | 1.1469 | 0.1978  | 2.19E-02 | 1.20E-01 | 0.8859 | -0.1748 | 5.35E-01 | 8.64E-01 | 1.0310 | 0.0440  | 7.65E-03 | 1.57E-01 | 1.1328 | 0.1798  |
| PS(18:0/20:4)             | Kidney | Negative | - | - | - | - | - | - | - | 1.88E-01 | 6.97E-01 | 1.0779 | 0.1082  | 4.96E-02 | 1.74E-01 | 0.8773 | -0.1888 | 2.71E-01 | 5.77E-01 | 0.9278 | -0.1081 | 2.51E-01 | 4.55E-01 | 1.1141 | 0.1559  | 2.15E-02 | 4.96E-01 | 0.7804 | -0.3577 | 6.93E-02 | 4.11E-01 | 0.7630 | -0.3903 |
| Carboxylic thromboxane A2 | Kidney | Negative | - | - | - | - | - | x | - | 1.99E-03 | 1.11E-01 | 0.5516 | -0.8582 | 1.50E-02 | 1.06E-01 | 1.4119 | 0.4976  | 3.27E-01 | 6.29E-01 | 1.1884 | 0.2490  | 1.86E-03 | 2.16E-02 | 1.6133 | 0.6900  | 5.39E-01 | 8.64E-01 | 0.9259 | -0.1110 | 1.48E-03 | 6.65E-02 | 0.5963 | -0.7460 |
| PS(18:0/0:0)              | Kidney | Negative | - | - | - | - | - | x | - | 3.44E-01 | 7.51E-01 | 1.1147 | 0.1566  | 1.62E-01 | 3.15E-01 | 1.1913 | 0.2525  | 6.53E-01 | 8.41E-01 | 0.9514 | -0.0718 | 6.99E-07 | 1.99E-04 | 3.1595 | 1.6597  | 6.09E-02 | 5.91E-01 | 0.7247 | -0.4645 | 9.21E-05 | 1.60E-02 | 0.4518 | -1.1461 |
| LyspC(18:0)               | Kidney | Negative | - | - | - | - | - | - | - | 2.04E-02 | 3.46E-01 | 0.7449 | -0.4249 | 6.58E-02 | 1.99E-01 | 1.2387 | 0.3088  | 2.55E-03 | 1.48E-01 | 1.4852 | 0.5707  | 5.29E-01 | 6.79E-01 | 0.9554 | -0.0658 | 6.73E-01 | 9.06E-01 | 1.0166 | 0.0238  | 1.50E-01 | 5.52E-01 | 1.2072 | 0.2716  |
| PC(18:0/18:1)             | Kidney | Positive | - | - | - | - | - | x | - | 1.83E-02 | 3.40E-01 | 1.1309 | 0.1775  | 2.35E-01 | 3.86E-01 | 1.0906 | 0.0848  | 4.19E-02 | 4.73E-01 | 0.9218 | -0.1174 | 1.09E-03 | 1.38E-02 | 1.2546 | 0.3272  | 1.86E-02 | 4.27E-01 | 0.8746 | -0.1933 | 3.12E-02 | 4.17E-01 | 0.7701 | -0.3769 |
| Eicosapentaenoic acid     | Kidney | Positive | - | - | - | - | - | - | - | 1.31E-02 | 2.77E-01 | 0.6947 | -0.5255 | 1.27E-01 | 4.78E-01 | 1.2388 | 0.3089  | 5.69E-02 | 4.73E-01 | 1.4237 | 0.5097  | 5.38E-01 | 6.86E-01 | 0.9571 | -0.0633 | 4.19E-02 | 6.80E-01 | 1.3265 | 0.4076  | 6.80E-01 | 8.01E-01 | 1.1376 | 0.1861  |
| PC(16:1/16:1)             | Kidney | Positive | - | - | - | - | - | - | - | 2.34E-01 | 5.71E-01 | 1.0702 | 0.0979  | 2.85E-01 | 6.01E-01 | 1.0528 | 0.0742  | 3.24E-01 | 5.89E-01 | 0.9478 | -0.0774 | 1.84E-02 | 1.20E-01 | 0.8681 | -0.2040 | 2.02E-01 | 8.59E-01 | 0.9401 | -0.0891 | 7.74E-02 | 4.38E-01 | 0.8112 | -0.3019 |
| Arachidonic acid          | Kidney | Positive | - | - | - | - | - | - | - | 8.18E-01 | 9.08E-01 | 0.9934 | -0.0096 | 9.23E-03 | 1.38E-01 | 1.2847 | 0.3614  | 3.36E-01 | 5.93E-01 | 1.1752 | 0.2329  | 7.30E-02 | 2.44E-01 | 1.2047 | 0.2687  | 6.23E-01 | 9.13E-01 | 1.0591 | 0.0829  | 1.35E-01 | 4.42E-01 | 0.8210 | -0.2846 |
| PC(18:0/20:4)             | Kidney | Positive | - | - | - | - | - | x | - | 6.75E-01 | 8.35E-01 | 0.9615 | -0.0565 | 1.87E-01 | 5.64E-01 | 0.9041 | -0.1454 | 7.83E-01 | 8.77E-01 | 0.9769 | -0.0338 | 2.01E-06 | 1.86E-04 | 0.6398 | -0.6670 | 7.02E-04 | 5.72E-02 | 1.3719 | 0.4561  | 1.04E-01 | 4.38E-01 | 1.5037 | 0.5885  |
| PC(18:1/14:0)             | Kidney | Positive | - | - | - | - | - | - | - | 8.55E-01 | 9.25E-01 | 1.0092 | 0.0132  | 4.50E-01 | 7.23E-01 | 0.9421 | -0.0860 | 1.25E-01 | 4.82E-01 | 0.8834 | -0.1789 | 4.87E-01 | 6.41E-01 | 1.0481 | 0.0678  | 1.80E-02 | 4.23E-01 | 0.8516 | -0.2318 | 2.25E-02 | 3.77E-01 | 0.7059 | -0.4844 |
| Arachidonyl Thio-PC       | Kidney | Positive | - | - | - | - | - | - | - | 1.22E-01 | 5.52E-01 | 1.0747 | 0.1039  | 4.72E-02 | 2.93E-01 | 1.0826 | 0.1145  | 1.04E-01 | 4.73E-01 | 0.9363 | -0.0950 | 1.14E-02 | 8.70E-02 | 1.1696 | 0.2260  | 1.25E-01 | 8.59E-01 | 0.9239 | -0.1142 | 9.31E-02 | 4.38E-01 | 0.8025 | -0.3174 |
| PC(0:16:0/22:6)           | Kidney | Positive | - | - | - | - | - | x | - | 8.45E-01 | 9.19E-01 | 0.9821 | -0.0261 | 1.90E-01 | 5.64E-01 | 0.9125 | -0.1321 | 8.88E-01 | 9.32E-01 | 1.0091 | 0.0131  | 2.24E-06 | 1.86E-04 | 0.6417 | -0.6401 | 2.28E-04 | 5.72E-02 | 1.3956 | 0.4809  | 7.14E-02 | 4.38E-01 | 1.5572 | 0.6390  |
| LyspC(0:18:0)             | Kidney | Positive | - | - | - | - | - | - | - | 1.02E-01 | 5.52E-01 | 0.6853 | -0.5451 | 1.37E-02 | 1.56E-01 | 1.3270 | 0.4082  | 8.60E-02 | 4.73E-01 | 1.3757 | 0.4602  | 1.81E-02 | 1.19E-01 | 1.4744 | 0.5601  | 5.57E-01 | 8.91E-01 | 0.9069 | -0.1410 | 1.23E-01 | 4.38E-01 | 0.7375 | -0.4393 |
| PC(16:0/20:5)             | Kidney | Positive | - | - | - | - | - | - | - | 8.39E-02 | 5.52E-01 | 0.8902 | -0.1678 | 3.02E-02 | 2.29E-01 | 1.1078 | 0.1477  | 1.69E-01 | 5.07E-01 | 1.1016 | 0.1396  | 7.37E-01 | 8.33E-01 | 1.0246 | 0.0350  | 9.50E-01 | 9.90E-01 | 0.9967 | -0.0048 | 2.57E-01 | 5.35E-01 | 0.9145 | -0.1290 |
| Phe                       | Kidney | Positive | - | - | - | - | - | - | - | 9.42E-01 | 9.77E-01 | 0.9680 | -0.0469 | 7.17E-04 | 2.34E-02 | 1.6874 | 0.7548  | 1.04E-01 | 4.73E-01 | 1.5374 | 0.6205  | 2.38E-01 | 4.21E-01 | 1.2103 | 0.2754  | 1.80E-01 | 8.59E-01 | 1.2941 | 0.3720  | 3.07E-01 | 5.64E-01 | 1.4774 | 0.5631  |
| Sphingomyelin             | Kidney | Positive | - | - | - | - | - | - | - | 7.91E-01 | 8.93E-01 | 1.0124 | 0.0177  | 4.43E-01 | 7.23E-01 | 0.9485 | -0.0762 | 2.73E-01 | 5.54E-01 | 0.9385 | -0.0916 | 7.71E-01 | 8.49E-01 | 0.9747 | -0.0370 | 3.81E-02 | 6.39E-01 | 0.8644 | -0.2102 | 4.94E-02 | 4.31E-01 | 0.7382 | -0.4380 |
| Hypoxanthine              | Kidney | Positive | - | - | - | - | - | - | - | 5.04E-01 | 7.35E-01 | 1.0374 | 0.0530  | 7.87E-04 | 7.34E-02 | 1.1750 | 0.2327  | 1.91E-01 | 5.14E-01 | 1.1339 | 0.1813  | 8.04E-01 | 8.70E-01 | 0.9901 | -0.0144 | 1.54E-01 | 8.59E-01 | 1.0849 | 0.1176  | 7.01E-01 | 8.06E-01 | 1.0497 | 0.0700  |
| Niacinamide               | Kidney | Positive | - | - | - | - | - | - | - | 8.01E-01 | 8.96E-01 | 0.9641 | -0.0527 | 3.25E-03 | 9.92E-02 | 1.1722 | 0.2292  | 1.75E-01 | 5.08E-01 | 1.1544 | 0.2071  | 8.26E-01 | 8.82E-01 | 1.0109 | 0.0156  | 6.94E-01 | 9.23E-01 | 1.0359 | 0.0508  | 5.45E-01 | 7.04E-01 | 0.9632 | -0.0541 |
| LyspC(16:0)               | Kidney | Positive | - | - | - | - | - | x | - | 8.28E-01 | 9.12E-01 | 0.9472 | -0.0783 | 4.51E-03 | 1.05E-01 | 1.2126 | 0.2781  | 5.65E-01 | 7.56E-01 | 1.1025 | 0.1407  | 1.96E-03 | 1.99E-02 | 1.2897 | 0.3671  | 6.58E-01 | 9.13E-01 | 0.9684 | -0.0463 | 9.39E-02 | 4.38E-01 | 0.8030 | -0.3165 |

**Table 6A. Pathways Analysis of Amifostine Protection**  
**Amifostine 50 mg**

| <b>Heart</b><br><b>Pathway</b>                        | <b>SD 4</b>         |                | <b>SD 9</b>         |                |
|-------------------------------------------------------|---------------------|----------------|---------------------|----------------|
|                                                       | <i>overlap size</i> | <i>p-value</i> | <i>overlap size</i> | <i>p-value</i> |
| Limonene and pinene degradation                       | 5(10)               | 3.36E-04       | -                   | -              |
| Pentose and Glucuronate Interconversions              | -                   | -              | 1(1)                | 1.85E-03       |
| Glycosylphosphatidylinositol(GPI)-anchor biosynthesis | 2(3)                | 7.90E-03       | -                   | -              |
| Selenoamino acid metabolism                           | -                   | -              | 1(4)                | 1.07E-02       |
| Vitamin B3 (nicotinate and nicotinamide) metabolism   | -                   | -              | 1(4)                | 1.07E-02       |
| Pentose phosphate pathway                             | -                   | -              | 1(5)                | 1.46E-02       |
| Saturated fatty acids beta-oxidation                  | -                   | -              | 1(5)                | 1.46E-02       |
| Xenobiotics metabolism                                | -                   | -              | 1(5)                | 1.46E-02       |
| Phosphatidylinositol phosphate metabolism             | -                   | -              | 1(8)                | 2.41E-02       |
| Fatty Acid Metabolism                                 | -                   | -              | 1(8)                | 2.41E-02       |
| Pyrimidine metabolism                                 | -                   | -              | 1(9)                | 2.69E-02       |
| Purine metabolism                                     | -                   | -              | 1(9)                | 2.69E-02       |
| Glycerophospholipid metabolism                        | 6(33)               | 2.97E-02       | -                   | -              |
| Fructose and mannose metabolism                       | 1(1)                | 3.26E-02       | -                   | -              |
| Nucleotide Sugar Metabolism                           | 1(1)                | 3.26E-02       | -                   | -              |
| Fatty acid activation                                 | -                   | -              | 1(15)               | 3.87E-02       |
| Glycosphingolipid metabolism                          | -                   | -              | 1(16)               | 4.07E-02       |
| De novo fatty acid biosynthesis                       | -                   | -              | 1(23)               | 4.82E-02       |
| Sialic acid metabolism                                | 2(7)                | 4.96E-02       | -                   | -              |

*Note.* Pathway analysis result with positive mode and negative mode combined.

<sup>a</sup> Numbers in parenthesis indicates the pathway size.

**Table 6B. Pathways Analysis of Amifostine Protection**  
**Amifostine 50 mg**

| <b>Spleen</b><br><b>Pathway</b>                           | <b>SD 4</b>         |                | <b>SD 9</b>         |                |
|-----------------------------------------------------------|---------------------|----------------|---------------------|----------------|
|                                                           | <i>overlap size</i> | <i>p-value</i> | <i>overlap size</i> | <i>p-value</i> |
| Aspartate and asparagine metabolism                       | 7(13)               | 8.40E-05       | 2(7)                | 2.97E-02       |
| Valine, leucine and isoleucine degradation                | 4(7)                | 4.20E-04       | 2(7)                | 4.20E-02       |
| Glycosphingolipid metabolism                              | -                   | -              | 3(6)                | 1.51E-03       |
| Histidine metabolism                                      | 3(5)                | 2.02E-03       | -                   | -              |
| Pyrimidine metabolism                                     | 5(16)               | 2.02E-03       | -                   | -              |
| Nitrogen metabolism                                       | 2(2)                | 4.03E-03       | -                   | -              |
| Beta-Alanine metabolism                                   | 3(6)                | 4.37E-03       | -                   | -              |
| Glutathione Metabolism                                    | 3(6)                | 4.37E-03       | -                   | -              |
| Vitamin B3 (nicotinate and nicotinamide) metabolism       | 3(6)                | 4.37E-03       | -                   | -              |
| Squalene and cholesterol biosynthesis                     | -                   | -              | 2(2)                | 4.54E-03       |
| Methionine and cysteine metabolism                        | 4(12)               | 5.46E-03       | -                   | -              |
| Purine metabolism                                         | 4(13)               | 6.30E-03       | -                   | -              |
| Glutamate metabolism                                      | 3(7)                | 6.72E-03       | 2(7)                | 4.20E-02       |
| Alanine and Aspartate Metabolism                          | 3(7)                | 6.72E-03       | -                   | -              |
| Butanoate metabolism                                      | 3(7)                | 6.72E-03       | 3(7)                | 7.39E-03       |
| Glycine, serine, alanine and threonine metabolism         | 4(14)               | 8.82E-03       | -                   | -              |
| Arginine and Proline Metabolism                           | 3(8)                | 9.24E-03       | -                   | -              |
| Tryptophan metabolism                                     | 3(9)                | 1.32E-02       | -                   | -              |
| Putative anti-Inflammatory metabolites formation from EPA | 2(4)                | 1.49E-02       | -                   | -              |
| Urea cycle/amino group metabolism                         | 3(10)               | 1.61E-02       | -                   | -              |
| Lysine metabolism                                         | 2(5)                | 2.23E-02       | -                   | -              |
| Bile acid biosynthesis                                    | 3(12)               | 2.39E-02       | -                   | -              |
| Leukotriene metabolism                                    | 3(12)               | 2.39E-02       | -                   | -              |
| Aminosugars metabolism                                    | 2(6)                | 3.28E-02       | -                   | -              |
| Lipoate metabolism                                        | -                   | -              | 1(1)                | 3.48E-02       |
| N-Glycan Degradation                                      | -                   | -              | 1(1)                | 3.48E-02       |
| C21-steroid hormone biosynthesis and metabolism           | 2(7)                | 3.67E-02       | -                   | -              |
| Vitamin B2 (riboflavin) metabolism                        | 1(1)                | 3.68E-02       | -                   | -              |
| Alkaloid biosynthesis II                                  | 1(1)                | 3.68E-02       | -                   | -              |
| Vitamin B1 (thiamin) metabolism                           | 1(1)                | 3.68E-02       | -                   | -              |
| Vitamin E metabolism                                      | 1(1)                | 3.68E-02       | -                   | -              |
| Mono-unsaturated fatty acid beta-oxidation                | 1(1)                | 3.68E-02       | -                   | -              |
| Ubiquinone Biosynthesis                                   | 1(1)                | 3.68E-02       | -                   | -              |
| Arachidonic acid metabolism                               | 3(14)               | 3.73E-02       | -                   | -              |

*Note.* Pathway analysis result with positive mode and negative mode combined.

<sup>a</sup> Numbers in parenthesis indicates the pathway size.

**Table 6C. Pathways Analysis of Amifostine Protection**  
**Amifostine 50 mg**

| <b>Kidney</b><br><b>Pathway</b>                   | <b>SD 4</b>         |                | <b>SD 9</b>         |                |
|---------------------------------------------------|---------------------|----------------|---------------------|----------------|
|                                                   | <i>overlap size</i> | <i>p-value</i> | <i>overlap size</i> | <i>p-value</i> |
| Beta-Alanine metabolism                           | -                   | -              | 5(6)                | 6.72E-04       |
| Glutathione Metabolism                            | -                   | -              | 3(3)                | 3.87E-03       |
| Vitamin A (retinol) metabolism                    | 5(7)                | 4.61E-02       | 3(9)                | 6.97E-03       |
| Glycerophospholipid metabolism                    | 11(19)              | 2.97E-02       | 3(10)               | 9.16E-03       |
| Glycine, serine, alanine and threonine metabolism | -                   | -              | 6(13)               | 1.14E-02       |
| Vitamin D3 (cholecalciferol) metabolism           | 4(4)                | 1.21E-02       | -                   | -              |
| Histidine metabolism                              | -                   | -              | 3(4)                | 1.31E-02       |
| Tryptophan metabolism                             | 3(4)                | 1.49E-02       | -                   | -              |
| Tyrosine metabolism                               | 6(11)               | 1.58E-02       | -                   | -              |
| Vitamin B9 (folate) metabolism                    | -                   | -              | 1(1)                | 1.86E-02       |
| Linoleate metabolism                              | 6(8)                | 1.98E-02       | -                   | -              |
| Methionine and cysteine metabolism                | -                   | -              | 5(11)               | 2.10E-02       |
| Glutamate metabolism                              | -                   | -              | 3(5)                | 2.76E-02       |
| Omega-3 fatty acid metabolism                     | 3(3)                | 3.15E-02       | -                   | -              |
| Sialic acid metabolism                            | -                   | -              | 1(2)                | 4.22E-02       |
| Hexose phosphorylation                            | -                   | -              | 1(2)                | 4.22E-02       |
| Ubiquinone Biosynthesis                           | -                   | -              | 1(2)                | 4.22E-02       |
| Purine metabolism                                 | 3(5)                | 4.67E-02       | -                   | -              |

*Note.* Pathway analysis result with positive mode and negative mode combined.

<sup>a</sup> Numbers in parenthesis indicates the pathway size.

**Table 6D. Pathways Analysis of Amifostine Protection**  
**Amifostine 200 mg**

| <b>Heart</b><br><b>Pathway</b>                        | <b>SD 4</b>         |                | <b>SD 9</b>         |                |
|-------------------------------------------------------|---------------------|----------------|---------------------|----------------|
|                                                       | <i>overlap size</i> | <i>p-value</i> | <i>overlap size</i> | <i>p-value</i> |
| Fatty acid activation                                 | -                   | -              | 6(15)               | 1.68E-04       |
| De novo fatty acid biosynthesis                       | -                   | -              | 7(23)               | 6.72E-04       |
| Xenobiotics metabolism                                | -                   | -              | 3(5)                | 2.27E-03       |
| Fructose and mannose metabolism                       | 1(1)                | 5.80E-03       | -                   | -              |
| Nucleotide Sugar Metabolism                           | 1(1)                | 5.80E-03       | -                   | -              |
| Linoleate metabolism                                  | -                   | -              | 4(12)               | 5.88E-03       |
| Fatty Acid Metabolism                                 | -                   | -              | 3(8)                | 8.65E-03       |
| Polyunsaturated fatty acid biosynthesis               | 1(2)                | 1.13E-02       | -                   | -              |
| Glycolysis and Gluconeogenesis                        | 1(2)                | 1.13E-02       | -                   | -              |
| Hexose phosphorylation                                | 1(2)                | 1.13E-02       | -                   | -              |
| Galactose metabolism                                  | 1(2)                | 1.13E-02       | -                   | -              |
| Arachidonic acid metabolism                           | -                   | -              | 3(9)                | 1.21E-02       |
| Omega-3 fatty acid metabolism                         | -                   | -              | 2(4)                | 1.27E-02       |
| Pyrimidine metabolism                                 | 2(9)                | 1.37E-02       | -                   | -              |
| Glycosphingolipid metabolism                          | -                   | -              | 4(16)               | 1.51E-02       |
| Starch and Sucrose Metabolism                         | 1(3)                | 2.03E-02       | -                   | -              |
| Glycosylphosphatidylinositol(GPI)-anchor biosynthesis | 1(3)                | 2.03E-02       | -                   | -              |
| Saturated fatty acids beta-oxidation                  | -                   | -              | 2(5)                | 2.12E-02       |
| N-Glycan biosynthesis                                 | 1(4)                | 2.64E-02       | -                   | -              |
| Nitrogen metabolism                                   | 1(2)                | 2.66E-02       | -                   | -              |
| Valine, leucine and isoleucine degradation            | 1(2)                | 2.66E-02       | -                   | -              |
| Fatty acid oxidation, peroxisome                      | -                   | -              | 1(1)                | 2.92E-02       |
| Aminosugars metabolism                                | 1(5)                | 3.51E-02       | -                   | -              |
| Pentose phosphate pathway                             | 1(5)                | 3.51E-02       | -                   | -              |
| Arginine and Proline Metabolism                       | 1(3)                | 4.18E-02       | -                   | -              |
| Butanoate metabolism                                  | 1(3)                | 4.18E-02       | -                   | -              |
| Alanine and Aspartate Metabolism                      | 1(3)                | 4.18E-02       | -                   | -              |

*Note.* Pathway analysis result with positive mode and negative mode combined.

<sup>a</sup> Numbers in parenthesis indicates the pathway size.



**Table 6E. Pathways Analysis of Amifostine Protection**  
**Amifostine 200 mg**

| Spleen<br>Pathway                                         | SD 4         |          | SD 9         |          |
|-----------------------------------------------------------|--------------|----------|--------------|----------|
|                                                           | overlap size | p-value  | overlap size | p-value  |
| Glycolysis and Gluconeogenesis                            | -            | -        | 7(7)         | 5.88E-04 |
| Pentose phosphate pathway                                 | -            | -        | 7(9)         | 6.72E-04 |
| Glycine, serine, alanine and threonine metabolism         | -            | -        | 8(10)        | 7.56E-04 |
| Tryptophan metabolism                                     | 4(9)         | 1.26E-03 | 7(9)         | 8.82E-03 |
| Aspartate and asparagine metabolism                       | 3(13)        | 3.25E-02 | 6(7)         | 1.43E-03 |
| Fructose and mannose metabolism                           | -            | -        | 5(6)         | 3.53E-03 |
| Prostaglandin formation from arachidonate                 | 6(11)        | 4.45E-03 | -            | -        |
| Vitamin B3 (nicotinate and nicotinamide) metabolism       | 3(6)         | 4.71E-03 | 5(6)         | 1.56E-02 |
| Pyruvate Metabolism                                       | -            | -        | 5(5)         | 4.96E-03 |
| Butanoate metabolism                                      | 1(2)         | 1.97E-02 | 6(7)         | 6.81E-03 |
| Ascorbate (Vitamin C) and Aldarate Metabolism             | -            | -        | 6(7)         | 6.81E-03 |
| Galactose metabolism                                      | -            | -        | 6(7)         | 6.81E-03 |
| Polyunsaturated fatty acid biosynthesis                   | 1(1)         | 7.73E-03 | -            | -        |
| Valine, leucine and isoleucine degradation                | 1(3)         | 2.77E-02 | 3(3)         | 8.57E-03 |
| Pyrimidine metabolism                                     | 4(16)        | 1.43E-02 | 3(3)         | 8.57E-03 |
| Lysine metabolism                                         | -            | -        | 3(3)         | 8.57E-03 |
| Purine metabolism                                         | -            | -        | 4(5)         | 1.03E-02 |
| Fatty acid activation                                     | 4(7)         | 1.08E-02 | -            | -        |
| TCA cycle                                                 | -            | -        | 4(4)         | 1.21E-02 |
| Propanoate metabolism                                     | -            | -        | 4(4)         | 1.21E-02 |
| Glycerophospholipid metabolism                            | -            | -        | 9(19)        | 1.32E-02 |
| Urea cycle/amino group metabolism                         | 3(10)        | 1.77E-02 | -            | -        |
| Fatty Acid Metabolism                                     | 3(5)         | 1.88E-02 | -            | -        |
| De novo fatty acid biosynthesis                           | 5(12)        | 2.56E-02 | -            | -        |
| Drug metabolism - cytochrome P450                         | -            | -        | 3(4)         | 2.92E-02 |
| Glutamate metabolism                                      | 2(7)         | 4.89E-02 | 3(4)         | 3.03E-02 |
| Glutathione Metabolism                                    | -            | -        | 3(4)         | 3.03E-02 |
| Putative anti-inflammatory metabolites formation from EPA | -            | -        | 2(2)         | 3.18E-02 |
| Histidine metabolism                                      | -            | -        | 2(2)         | 3.18E-02 |
| Arginine and Proline Metabolism                           | -            | -        | 2(2)         | 3.18E-02 |
| Beta-Alanine metabolism                                   | 2(6)         | 3.53E-02 | 2(2)         | 3.18E-02 |
| Trihydroxycoprostanoyl-CoA beta-oxidation                 | -            | -        | 2(2)         | 3.18E-02 |
| Glycosphingolipid metabolism                              | 3(6)         | 3.39E-02 | -            | -        |
| Aminosugars metabolism                                    | 2(6)         | 3.53E-02 | -            | -        |
| Fatty acid oxidation, peroxisome                          | -            | -        | 2(2)         | 3.74E-02 |
| Parathio degradation                                      | 1(1)         | 3.92E-02 | -            | -        |

Note. Pathway analysis result with positive mode and negative mode combined.

<sup>a</sup> Numbers in parenthesis indicates the pathway size.

**Table 6F. Pathways Analysis of Amifostine Protection**  
**Amifostine 200 mg**

| <b>Kidney</b><br><b>Pathway</b>                     | <b>SD 4</b>         |                | <b>SD 9</b>         |                |
|-----------------------------------------------------|---------------------|----------------|---------------------|----------------|
|                                                     | <i>overlap size</i> | <i>p-value</i> | <i>overlap size</i> | <i>p-value</i> |
| Beta-Alanine metabolism                             | 6(6)                | 1.09E-03       | 6(6)                | 5.88E-04       |
| Valine, leucine and isoleucine degradation          | 2(3)                | 7.56E-04       | -                   | -              |
| Butanoate metabolism                                | 8(10)               | 1.51E-03       | -                   | -              |
| Tryptophan metabolism                               | 2(4)                | 1.76E-03       | 3(10)               | 2.34E-02       |
| Pyruvate Metabolism                                 | 5(5)                | 2.27E-03       | -                   | -              |
| Aspartate and asparagine metabolism                 | 10(15)              | 2.69E-03       | -                   | -              |
| Ascorbate (Vitamin C) and Aldarate Metabolism       | 4(8)                | 2.86E-03       | 6(8)                | 7.31E-03       |
| Alanine and Aspartate Metabolism                    | 6(7)                | 3.19E-03       | -                   | -              |
| Methionine and cysteine metabolism                  | 8(11)               | 3.36E-03       | 1(3)                | 2.20E-02       |
| Vitamin B9 (folate) metabolism                      | -                   | -              | 1(1)                | 5.55E-03       |
| Histidine metabolism                                | 4(4)                | 5.97E-03       | 3(4)                | 4.68E-02       |
| Vitamin B3 (nicotinate and nicotinamide) metabolism | -                   | -              | 3(6)                | 7.31E-03       |
| Glycerophospholipid metabolism                      | 4(19)               | 3.65E-02       | 2(10)               | 7.65E-03       |
| Pentose phosphate pathway                           | 3(7)                | 1.14E-02       | -                   | -              |
| Sialic acid metabolism                              | 3(8)                | 1.60E-02       | 1(2)                | 1.34E-02       |
| Chondroitin sulfate degradation                     | 2(3)                | 1.47E-02       | -                   | -              |
| Glycosphingolipid biosynthesis - globoseries        | 2(3)                | 1.47E-02       | -                   | -              |
| Glyoxylate and Dicarboxylate Metabolism             | 2(3)                | 1.47E-02       | -                   | -              |
| Glycine, serine, alanine and threonine metabolism   | 8(13)               | 1.54E-02       | 1(5)                | 3.62E-02       |
| Biopterin metabolism                                | -                   | -              | 2(4)                | 1.87E-02       |
| Arginine and Proline Metabolism                     | 6(9)                | 2.03E-02       | -                   | -              |
| Aminosugars metabolism                              | 6(9)                | 2.03E-02       | -                   | -              |
| Phosphatidylinositol phosphate metabolism           | 3(9)                | 2.06E-02       | -                   | -              |
| Glutathione Metabolism                              | 3(3)                | 2.08E-02       | -                   | -              |
| Vitamin B1 (thiamin) metabolism                     | 3(3)                | 2.08E-02       | -                   | -              |
| Glycosphingolipid metabolism                        | -                   | -              | 1(3)                | 2.20E-02       |
| Selenoamino acid metabolism                         | -                   | -              | 1(3)                | 2.20E-02       |
| Heparan sulfate degradation                         | 2(4)                | 2.24E-02       | -                   | -              |
| Glycosphingolipid biosynthesis - ganglioseries      | 2(4)                | 2.24E-02       | -                   | -              |
| Glycolysis and Gluconeogenesis                      | 5(7)                | 2.25E-02       | -                   | -              |
| Glutamate metabolism                                | 4(5)                | 2.39E-02       | -                   | -              |
| Purine metabolism                                   | 8(14)               | 2.49E-02       | -                   | -              |
| Vitamin B6 (pyridoxine) metabolism                  | 1(2)                | 2.55E-02       | -                   | -              |
| Propanoate metabolism                               | 1(2)                | 2.57E-02       | -                   | -              |
| Leukotriene metabolism                              | -                   | -              | 1(4)                | 2.98E-02       |
| Pentose and Glucuronate Interconversions            | 2(5)                | 3.34E-02       | -                   | -              |
| Urea cycle/amino group metabolism                   | -                   | -              | 3(12)               | 3.74E-02       |
| Parathio degradation                                | -                   | -              | 1(1)                | 4.13E-02       |
| Ubiquinone Biosynthesis                             | -                   | -              | 1(2)                | 4.57E-02       |
| Hexose phosphorylation                              | -                   | -              | 1(2)                | 4.57E-02       |
| N-Glycan biosynthesis                               | 2(6)                | 4.77E-02       | -                   | -              |
| N-Glycan Degradation                                | 1(1)                | 4.81E-02       | -                   | -              |
| Proteoglycan biosynthesis                           | 1(1)                | 4.81E-02       | -                   | -              |
| Keratan sulfate degradation                         | 1(1)                | 4.81E-02       | -                   | -              |

*Note.* Pathway analysis result with positive mode and negative mode combined.

<sup>a</sup> Numbers in parenthesis indicates the pathway size.









1. The first step is to identify the problem.  
2. The second step is to define the objectives.  
3. The third step is to develop a plan.  
4. The fourth step is to implement the plan.  
5. The fifth step is to evaluate the results.

6. The sixth step is to conclude.
